# Supplementary material for: Evolution of Yin and Yang isoforms of a chromatin remodeling subunit precedes the creation of two genes
Source: eLife. 2019 Sep 9;8:e48119. doi: 10.7554/eLife.48119 (PMC6752949; doi:10.7554/eLife.48119)
Supplement: Figure 1—figure supplement 1—source data 1. [file elife-48119-fig1-figsupp1-data1.xlsx]

## Sheet: Figure 1-figure supplement 1
strain	0-24	24-36	36-48	48-60	60-72	72-96	date
ARLdel(PTM88)	0.916667	3.08333	5.16667	3.58333	0.166667	0	2017-03-21
ARLdel(PTM88)	1	4.16667	4.75	5.75	3.5	0	2017-03-21
ARLdel(PTM88)	0.958333	3.5	4.91667	6.58333	3.16667	0	2017-03-21
ARLdel(PTM88)	0.375	4	4.75	5.91667	6.83333	0.25	2017-03-21
ARLdel(PTM88)	0.833333	4.16667	4.58333	6.5	6.83333	0	2017-03-21
ARLdel(PTM88)	1.08333	3.75	5.08333	6	5.25	2.41667	2017-03-21
ARLdel(PTM88)	1	4.08333	5.33333	6.5	5.66667	0	2017-03-21
ARLdel(PTM88)	1.08333	3.91667	5.16667	6.16667	6.83333	0.0833333	2017-03-21
ARLdel(PTM88)	0.625	3	4.58333	5.41667	4.25	0.666667	2017-03-21
ARLdel(PTM88)	1.08333	4.33333	4.58333	5.33333	2.91667	0	2017-03-21
NIL(PTM66)	1.125	4.83333	5.83333	6.91667	7.58333	0.0833333	2017-03-21
NIL(PTM66)	1	4.41667	5.83333	7.25	7.75	0.416667	2017-03-21
NIL(PTM66)	0.875	4.41667	5.75	7	7.66667	0.166667	2017-03-21
NIL(PTM66)	1.20833	4.66667	5.91667	7.08333	5.91667	0.416667	2017-03-21
NIL(PTM66)	0.833333	4.75	5.41667	7.16667	7.25	0.0833333	2017-03-21
NIL(PTM66)	0.833333	4.75	6.08333	7.58333	7.91667	0.166667	2017-03-21
NIL(PTM66)	1.375	4.91667	6.08333	6.83333	8.41667	0	2017-03-21
NIL(PTM66)	1.33333	4.58333	5.75	7.08333	8	0.333333	2017-03-21
NIL(PTM66)	0.916667	5	5.75	6.66667	7.58333	0.166667	2017-03-21
NIL(PTM66)	1.08333	4.75	6.25	7.41667	8	0.0833333	2017-03-21
NIL(PTM66)	0.458333	4.5	5.91667	6.75	6.83333	0.333333	2017-03-21
NIL(PTM66)	0.916667	4.5	5.75	7.25	7.08333	0	2017-03-21
N2	2.13194	7.04167	6.86111	4.44444	1.01389	0.833333	2018-05-01
N2	2.15972	7.05556	7.97222	5.66667	1.375	0.430556	2018-05-01
N2	1.86111	6.77778	7.47222	6.83333	2.45833	0.444444	2018-05-01
N2	2.0625	6.875	7.09722	7.05556	2.40278	0.666667	2018-05-01
N2	2.25	6.47222	7.88889	6.34722	2.29167	0.930556	2018-05-01
ARLintron(PTM416)	1.98611	6.79167	7.41667	6.13889	1.29167	0.847222	2018-05-01
ARLintron(PTM416)	1.98611	6.45833	7.09722	5.90278	2.45833	0.666667	2018-05-01
ARLintron(PTM416)	2.01389	6.83333	7.29167	6.16667	2.79167	0.305556	2018-05-01
ARLintron(PTM416)	2.00694	6.69444	6.94444	6.02778	1.98611	0.333333	2018-05-01
ARLintron(PTM416)	2.23611	6.84722	7.16667	6	1.73611	0.513889	2018-05-01
