# Supplementary material for: Evolution of Yin and Yang isoforms of a chromatin remodeling subunit precedes the creation of two genes
Source: eLife. 2019 Sep 9;8:e48119. doi: 10.7554/eLife.48119 (PMC6752949; doi:10.7554/eLife.48119)
Supplement: Figure 1—source data 1. [file elife-48119-fig1-data1.xlsx]

## Sheet: Figure1c
assay	strain1	strain2	strain1Fitness	date	Taqman Probe
CX12311(vs. CX12311)	N2*(CX12311)	PTM288(CX12311_bc)	-0.122911	2016-12-19	PTM09
CX12311(vs. CX12311)	N2*(CX12311)	PTM288(CX12311_bc)	-0.131548	2016-12-19	PTM09
CX12311(vs. CX12311)	N2*(CX12311)	PTM288(CX12311_bc)	0.000166096	2016-12-19	PTM09
CX12311(vs. CX12311)	N2*(CX12311)	PTM288(CX12311_bc)	0.0113943	2017-02-15	PTM09
CX12311(vs. CX12311)	N2*(CX12311)	PTM288(CX12311_bc)	-0.0112946	2017-02-15	PTM09		Taqman Probe	Target SNP
CX12311(vs. CX12311)	N2*(CX12311)	PTM288(CX12311_bc)	0.128329	2017-02-15	PTM09		ChrI_snp	spe-9(kah132)
CX12311(vs. CX12311)	N2*(CX12311)	PTM288(CX12311_bc)	-0.0875364	2017-02-15	PTM09		PTM09	dpy-10 (kah83)
CX12311(vs. CX12311)	N2*(CX12311)	PTM288(CX12311_bc)	-0.127592	2017-02-15	PTM09
CX12311(vs. CX12311)	N2*(CX12311)	PTM288(CX12311_bc)	-0.249307	2017-02-15	PTM09
CX12311(vs. CX12311)	N2*(CX12311)	PTM288(CX12311_bc)	-0.0840381	2017-05-03	PTM09
CX12311(vs. CX12311)	N2*(CX12311)	PTM288(CX12311_bc)	-0.00888153	2017-05-03	PTM09
CX12311(vs. CX12311)	N2*(CX12311)	PTM288(CX12311_bc)	0.0696836	2017-05-03	PTM09
CX12311(vs. CX12311)	N2*(CX12311)	PTM288(CX12311_bc)	0.048614	2017-05-03	PTM09
CX12311(vs. CX12311)	N2*(CX12311)	PTM288(CX12311_bc)	0.0380303	2017-05-03	PTM09
CX12311(vs. CX12311)	N2*(CX12311)	PTM288(CX12311_bc)	-0.0363295	2017-05-03	PTM09
PTM88(vs.CX12311)	nurf-1 ARL(PTM88)	PTM288(CX12311_bc)	-0.977094	2017-02-15	PTM09
PTM88(vs.CX12311)	nurf-1 ARL(PTM88)	PTM288(CX12311_bc)	-1.05783	2017-02-15	PTM09
PTM88(vs.CX12311)	nurf-1 ARL(PTM88)	PTM288(CX12311_bc)	-1.02057	2017-02-15	PTM09
PTM88(vs.CX12311)	nurf-1 ARL(PTM88)	PTM288(CX12311_bc)	-1.03006	2017-02-15	PTM09
PTM88(vs.CX12311)	nurf-1 ARL(PTM88)	PTM288(CX12311_bc)	-0.943934	2017-02-15	PTM09
PTM88(vs.CX12311)	nurf-1 ARL(PTM88)	PTM288(CX12311_bc)	-0.998272	2017-02-15	PTM09
PTM66(vs.CX12311)	nurf-1 NIL(PTM66)	PTM288(CX12311_bc)	-1.1079	2017-02-15	PTM09
PTM66(vs.CX12311)	nurf-1 NIL(PTM66)	PTM288(CX12311_bc)	-1.25676	2017-02-15	PTM09
PTM66(vs.CX12311)	nurf-1 NIL(PTM66)	PTM288(CX12311_bc)	-1.20455	2017-02-15	PTM09
PTM66(vs.CX12311)	nurf-1 NIL(PTM66)	PTM288(CX12311_bc)	-1.02493	2017-02-15	PTM09
PTM66(vs.CX12311)	nurf-1 NIL(PTM66)	PTM288(CX12311_bc)	-1.09954	2017-02-15	PTM09
PTM66(vs.CX12311)	nurf-1 NIL(PTM66)	PTM288(CX12311_bc)	-1.07913	2017-02-15	PTM09
N2(vs. N2)	PTM229(N2_bc)	N2	-0.00261506	2018-06-22	PTM09
N2(vs. N2)	PTM229(N2_bc)	N2	-0.0465988	2018-06-22	PTM09
N2(vs. N2)	PTM229(N2_bc)	N2	0.00691966	2018-06-22	PTM09
N2(vs. N2)	PTM229(N2_bc)	N2	-0.0160849	2018-06-22	PTM09
N2(vs. N2)	PTM229(N2_bc)	N2	-0.0262354	2018-06-22	PTM09
N2(vs. N2)	PTM229(N2_bc)	N2	-0.0121827	2018-06-22	PTM09
N2(vs.ARLi)	PTM229(N2_bc)	(ARLi)PTM416	0.153296	2018-06-22	PTM09
N2(vs.ARLi)	PTM229(N2_bc)	(ARLi)PTM416	0.157342	2018-06-22	PTM09
N2(vs.ARLi)	PTM229(N2_bc)	(ARLi)PTM416	0.188131	2018-06-22	PTM09
N2(vs.ARLi)	PTM229(N2_bc)	(ARLi)PTM416	0.0869818	2018-06-22	PTM09
N2(vs.ARLi)	PTM229(N2_bc)	(ARLi)PTM416	0.187363	2018-06-22	PTM09
N2(vs.ARLi)	PTM229(N2_bc)	(ARLi)PTM416	0.178228	2018-06-22	PTM09
PTM88(vs.PTM66)	PTM88	PTM66	0.217005	2018-06-22	ChrI_snp
PTM88(vs.PTM66)	PTM88	PTM66	0.105495	2018-06-22	ChrI_snp
PTM88(vs.PTM66)	PTM88	PTM66	-0.0345996	2018-06-22	ChrI_snp
PTM88(vs.PTM66)	PTM88	PTM66	0.0659483	2018-06-22	ChrI_snp
PTM88(vs.PTM66)	PTM88	PTM66	0.0977723	2018-06-22	ChrI_snp
PTM88(vs.PTM66)	PTM88	PTM66	0.171176	2018-06-22	ChrI_snp
PTM88(vs. PTM417)	PTM88	PTM417	0.0541987	2018-06-22	ChrI_snp
PTM88(vs. PTM417)	PTM88	PTM417	-0.0337968	2018-06-22	ChrI_snp
PTM88(vs. PTM417)	PTM88	PTM417	-0.0389535	2018-06-22	ChrI_snp
PTM88(vs. PTM417)	PTM88	PTM417	-0.0475373	2018-06-22	ChrI_snp
PTM88(vs. PTM417)	PTM88	PTM417	0.0318616	2018-06-22	ChrI_snp

## Sheet: Figure1d
strain	fecundity	date
N2	293.5	2018-05-01
N2	321.833	2018-05-01
N2	332.5	2018-05-01
N2	338.667	2018-05-01
N2	341.167	2018-05-01
(ARLi)PTM416	317.5	2018-05-01
(ARLi)PTM416	318.667	2018-05-01
(ARLi)PTM416	329	2018-05-01
(ARLi)PTM416	312	2018-05-01
(ARLi)PTM416	320.833	2018-05-01
N2	348.333	2018-08-29
N2	367.167	2018-08-29
N2	370.833	2018-08-29
N2	362	2018-08-29
N2	357.833	2018-08-29
(ARLi)PTM416	338.667	2018-08-29
(ARLi)PTM416	345	2018-08-29
(ARLi)PTM416	322.5	2018-08-29
(ARLi)PTM416	349.167	2018-08-29
(ARLi)PTM416	324.167	2018-08-29
N2	339.333	2018-08-30
N2	342	2018-08-30
N2	305.833	2018-08-30
N2	310	2018-08-30
N2	314	2018-08-30
(ARLi)PTM416	323	2018-08-30
(ARLi)PTM416	329.833	2018-08-30
(ARLi)PTM416	284.833	2018-08-30
(ARLi)PTM416	302.5	2018-08-30
(ARLi)PTM416	298.667	2018-08-30

## Sheet: Fgiure1e
timepoint	NofChange
52hrs	3384
60hrs	25
