# Supplementary material for: Evolution of Yin and Yang isoforms of a chromatin remodeling subunit precedes the creation of two genes
Source: eLife. 2019 Sep 9;8:e48119. doi: 10.7554/eLife.48119 (PMC6752949; doi:10.7554/eLife.48119)
Supplement: Figure 2—figure supplement 1—source data 1. [file elife-48119-fig2-figsupp1-data1.xlsx]

## Sheet: Figure 2-figure supplement 3a
strain	0-24	24-36	36-48	48-60	60-72	72-96	96-120	genotype	nurf-1.d rescue
N2	2.36111	6.68056	6.68056	5.27778	1.30556	0.243056	0	+	-
N2	2.01389	6.38889	6.34722	7.13889	3.61111	0.215278	0	+	-
N2	2.40278	6.54167	6.70833	5.51389	0.888889	0.368056	0	+	-
N2	2.33333	6.61111	7.08333	5.26389	1.02778	0.1875	0	+	-
N2	2.16667	6.72222	7.16667	6.08333	1.84722	0.305556	0	+	-
n4295	1.03472	3.33333	4.19444	4.31944	3.55556	1.33333	0.1875	n4295	-
n4295	0.875	3.52778	4.30556	4.91667	5.18056	2.25	0.166667	n4295	-
n4295	1.0625	3.30556	4.34722	4.47222	4.04167	1.71528	0.173611	n4295	-
n4295	0.944444	3.61111	4.19444	4.69444	4.38889	1.22222	0.166667	n4295	-
n4295	0.881944	3.48611	4.38889	4.86111	4.13889	2.16667	0.180556	n4295	-
n4295dMos	2.43056	6.375	6.76389	6.80556	2.66667	0.298611	0	n4295	+
n4295dMos	2.25	6.58333	7.02778	6.73611	1.29167	0.0972222	0	n4295	+
n4295dMos	2.22222	6.38889	6.59722	6.55556	3.61111	0.368056	0	n4295	+
n4295dMos	2.06944	7.02778	7.26389	5.73611	2.23611	0.215278	0	n4295	+
n4295dMos	2.15972	6.19444	6.72222	6.13889	1.56944	0.319444	0	n4295	+

## Sheet: Figure 2-figure supplement 3b
strain	0-24	24-36	36-48	48-60	60-72	72-96	genotype	nurf-1.d rescue
CX12311	1.80556	7.16667	6.65278	2.45833	0.180556	0.0277778	+	-
CX12311	1.85417	7.77778	6.75	2.86111	0.486111	0.0416667	+	-
CX12311	1.89583	7.88889	7.73611	4.20833	0.402778	0.0208333	+	-
CX12311	1.91667	7.83333	6.83333	2.58333	0.513889	0.0625	+	-
CX12311	1.67361	7.80556	7.06944	2.83333	0.375	0.0138889	+	-
PTM88	1.22917	4.375	4.55556	4.31944	2.28333	0.3	kah3	-
PTM88	1.33333	4.75	5.20833	3.72222	1	0.25	kah3	-
PTM88	1.3125	4.76389	5.41667	5.55556	2.91667	0.6875	kah3	-
PTM88	1.27778	4.23611	4.84722	4.38889	2.56944	0.483333	kah3	-
PTM88	1.51389	4.56944	5.30556	4.95833	2.09722	0.520833	kah3	-
ARLd_dMos	1.67361	6.55556	6.94444	4.63889	1.31667	0.166667	kah3	+
ARLd_dMos	1.41667	5.88889	5.44444	4.91667	1.21667	0.025	kah3	+
ARLd_dMos	1.61111	6.4375	7.83333	4.52083	0.270833	0.1875	kah3	+
ARLd_dMos	1.52083	6.48333	7.58333	4.31667	0.916667	0	kah3	+
ARLd_dMos	1.60417	6.63333	6.88333	5.21667	1.11667	0.0583333	kah3	+
