# Supplementary material for: Evolution of Yin and Yang isoforms of a chromatin remodeling subunit precedes the creation of two genes
Source: eLife. 2019 Sep 9;8:e48119. doi: 10.7554/eLife.48119 (PMC6752949; doi:10.7554/eLife.48119)
Supplement: Figure 2—figure supplement 2—source data 1. [file elife-48119-fig2-figsupp2-data1.xlsx]

## Sheet: Figure 2-figure supplement 2
strain	fecundity	date	genotype
N2	325	2018-12-02	+
N2	325	2018-12-02	+
N2	355	2018-12-02	+
N2	308	2018-12-02	+
N2	304	2018-12-02	+
N2	331	2018-12-02	+
N2	352	2018-12-02	+
N2	306	2018-12-02	+
N2	304	2018-12-02	+
N2	358	2018-12-02	+
N2	366	2018-12-02	+
N2	319	2018-12-02	+
n4295(MT13649)	248	2018-12-02	n4295
n4295(MT13649)	299	2018-12-02	n4295
n4295(MT13649)	312	2018-12-02	n4295
n4295(MT13649)	275	2018-12-02	n4295
n4295(MT13649)	200	2018-12-02	n4295
n4295(MT13649)	328	2018-12-02	n4295
n4295(MT13649)	318	2018-12-02	n4295
n4295(MT13649)	223	2018-12-02	n4295
n4295(MT13649)	317	2018-12-02	n4295
n4295(MT13649)	303	2018-12-02	n4295
n4295(MT13649)	309	2018-12-02	n4295
n4295(MT13649)	191	2018-12-02	n4295
STOP18	0	2018-12-02	kah96
STOP18	8	2018-12-02	kah96
STOP18	0	2018-12-02	kah96
STOP18	0	2018-12-02	kah96
STOP18	23	2018-12-02	kah96
STOP18	12	2018-12-02	kah96
STOP18	7	2018-12-02	kah96
STOP18	0	2018-12-02	kah96
STOP18	8	2018-12-02	kah96
STOP18	0	2018-12-02	kah96
STOP18	14	2018-12-02	kah96
STOP18	0	2018-12-02	kah96
n4295;STOP18	7	2018-12-02	n4295;kah96
n4295;STOP18	0	2018-12-02	n4295;kah96
n4295;STOP18	3	2018-12-02	n4295;kah96
n4295;STOP18	0	2018-12-02	n4295;kah96
n4295;STOP18	23	2018-12-02	n4295;kah96
n4295;STOP18	20	2018-12-02	n4295;kah96
n4295;STOP18	11	2018-12-02	n4295;kah96
n4295;STOP18	0	2018-12-02	n4295;kah96
n4295;STOP18	18	2018-12-02	n4295;kah96
n4295;STOP18	1	2018-12-02	n4295;kah96
n4295;STOP18	3	2018-12-02	n4295;kah96
n4295;STOP18	0	2018-12-02	n4295;kah96
