# Supplementary material for: Evolution of Yin and Yang isoforms of a chromatin remodeling subunit precedes the creation of two genes
Source: eLife. 2019 Sep 9;8:e48119. doi: 10.7554/eLife.48119 (PMC6752949; doi:10.7554/eLife.48119)
Supplement: Figure 3—source data 1. [file elife-48119-fig3-data1.xlsx]

## Sheet: Figure3b
strain	fecundity	date
N2	288	2018-11-28
N2	325	2018-11-28
N2	327	2018-11-28
N2	306	2018-11-28
N2	219	2018-11-28
N2	324	2018-11-28
N2	298	2018-11-28
N2	288	2018-11-28
N2	276	2018-11-28
N2	339	2018-11-28
N2	300	2018-11-28
N2	262	2018-11-28
STOP15(PTM319)	164	2018-11-28
STOP15(PTM319)	94	2018-11-28
STOP15(PTM319)	105	2018-11-28
STOP15(PTM319)	25	2018-11-28
STOP15(PTM319)	31	2018-11-28
STOP15(PTM319)	148	2018-11-28
STOP15(PTM319)	96	2018-11-28
STOP15(PTM319)	82	2018-11-28
STOP15(PTM319)	12	2018-11-28
STOP15(PTM319)	173	2018-11-28
STOP15(PTM319)	205	2018-11-28
STOP15(PTM319)	47	2018-11-28
STOP2all(PTM332)	0	2018-11-28
STOP2all(PTM332)	0	2018-11-28
STOP2all(PTM332)	0	2018-11-28
STOP2all(PTM332)	0	2018-11-28
STOP2all(PTM332)	0	2018-11-28
STOP2all(PTM332)	0	2018-11-28
STOP2all(PTM332)	0	2018-11-28
STOP2all(PTM332)	0	2018-11-28
STOP2all(PTM332)	0	2018-11-28
STOP2all(PTM332)	0	2018-11-28
STOP2all(PTM332)	0	2018-11-28
STOP2all(PTM332)	0	2018-11-28
STOP26(PTM203)	286	2018-11-28
STOP26(PTM203)	279	2018-11-28
STOP26(PTM203)	313	2018-11-28
STOP26(PTM203)	301	2018-11-28
STOP26(PTM203)	258	2018-11-28
STOP26(PTM203)	257	2018-11-28
STOP26(PTM203)	275	2018-11-28
STOP26(PTM203)	272	2018-11-28
STOP26(PTM203)	383	2018-11-28
STOP26(PTM203)	343	2018-11-28
STOP26(PTM203)	324	2018-11-28
STOP26(PTM203)	226	2018-11-28
N2	325	2018-12-02
N2	325	2018-12-02
N2	355	2018-12-02
N2	308	2018-12-02
N2	304	2018-12-02
N2	331	2018-12-02
N2	352	2018-12-02
N2	306	2018-12-02
N2	304	2018-12-02
N2	358	2018-12-02
N2	366	2018-12-02
N2	319	2018-12-02
STOP18(PTM322)	0	2018-12-02
STOP18(PTM322)	8	2018-12-02
STOP18(PTM322)	0	2018-12-02
STOP18(PTM322)	0	2018-12-02
STOP18(PTM322)	23	2018-12-02
STOP18(PTM322)	12	2018-12-02
STOP18(PTM322)	7	2018-12-02
STOP18(PTM322)	0	2018-12-02
STOP18(PTM322)	8	2018-12-02
STOP18(PTM322)	0	2018-12-02
STOP18(PTM322)	14	2018-12-02
STOP18(PTM322)	0	2018-12-02
STOP15(PTM319)	70	2018-12-02
STOP15(PTM319)	0	2018-12-02
STOP15(PTM319)	22	2018-12-02
STOP15(PTM319)	50	2018-12-02
STOP15(PTM319)	0	2018-12-02
STOP15(PTM319)	105	2018-12-02
STOP15(PTM319)	1	2018-12-02
STOP15(PTM319)	72	2018-12-02
STOP15(PTM319)	11	2018-12-02
STOP15(PTM319)	70	2018-12-02
STOP15(PTM319)	55	2018-12-02
STOP15(PTM319)	86	2018-12-02
N2	349	2019-02-03
N2	349	2019-02-03
N2	338	2019-02-03
N2	318	2019-02-03
N2	340	2019-02-03
N2	375	2019-02-03
N2	355	2019-02-03
N2	306	2019-02-03
N2	307	2019-02-03
N2	314	2019-02-03
N2	319	2019-02-03
STOP1(PTM316 )	126	2019-02-03
STOP1(PTM316 )	117	2019-02-03
STOP1(PTM316 )	163	2019-02-03
STOP1(PTM316 )	109	2019-02-03
STOP1(PTM316 )	183	2019-02-03
STOP1(PTM316 )	186	2019-02-03
STOP1(PTM316 )	135	2019-02-03
STOP1(PTM316 )	127	2019-02-03
STOP1(PTM316 )	128	2019-02-03
STOP1(PTM316 )	158	2019-02-03
STOP1(PTM316 )	140	2019-02-03
STOP1(PTM316 )	27	2019-02-03
STOP2(PTM317 )	137	2019-02-03
STOP2(PTM317 )	181	2019-02-03
STOP2(PTM317 )	58	2019-02-03
STOP2(PTM317 )	99	2019-02-03
STOP2(PTM317 )	133	2019-02-03
STOP2(PTM317 )	79	2019-02-03
STOP2(PTM317 )	10	2019-02-03
STOP2(PTM317 )	19	2019-02-03
STOP2(PTM317 )	94	2019-02-03
STOP2(PTM317 )	64	2019-02-03
STOP2(PTM317 )	50	2019-02-03
STOP7(PTM487 )	0	2019-02-03
STOP7(PTM487 )	4	2019-02-03
STOP7(PTM487 )	0	2019-02-03
STOP7(PTM487 )	0	2019-02-03
STOP7(PTM487 )	8	2019-02-03
STOP7(PTM487 )	0	2019-02-03
STOP7(PTM487 )	0	2019-02-03
STOP7(PTM487 )	0	2019-02-03
STOP7(PTM487 )	0	2019-02-03
STOP7(PTM487 )	0	2019-02-03
STOP7(PTM487 )	4	2019-02-03
STOP19(PTM325 )	0	2019-02-03
STOP19(PTM325 )	0	2019-02-03
STOP19(PTM325 )	0	2019-02-03
STOP19(PTM325 )	0	2019-02-03
STOP19(PTM325 )	0	2019-02-03
STOP19(PTM325 )	2	2019-02-03
STOP19(PTM325 )	0	2019-02-03
STOP19(PTM325 )	0	2019-02-03
STOP19(PTM325 )	1	2019-02-03
STOP19(PTM325 )	0	2019-02-03
STOP19(PTM325 )	0	2019-02-03
STOP23(PTM98 )	347	2019-02-03
STOP23(PTM98 )	330	2019-02-03
STOP23(PTM98 )	358	2019-02-03
STOP23(PTM98 )	300	2019-02-03
STOP23(PTM98 )	335	2019-02-03
STOP23(PTM98 )	303	2019-02-03
STOP23(PTM98 )	382	2019-02-03
STOP23(PTM98 )	271	2019-02-03
STOP23(PTM98 )	324	2019-02-03
STOP23(PTM98 )	342	2019-02-03
STOP23(PTM98 )	342	2019-02-03
STOP23(PTM98 )	335	2019-02-03
N2	376	2017-01-01
N2	301	2017-01-01
N2	354	2017-01-01
N2	350	2017-01-01
N2	305	2017-01-01
N2	382	2017-01-01
N2	337	2017-01-01
N2	305	2017-01-01
N2	357	2017-01-01
N2	319	2017-01-01
N2	300	2017-01-01
N2	332	2017-01-01
N2	354	2017-01-01
N2	322	2017-01-01
N2	299	2017-01-01
N2	355	2017-01-01
n4295(MT13649)	331	2017-01-01
n4295(MT13649)	292	2017-01-01
n4295(MT13649)	267	2017-01-01
n4295(MT13649)	269	2017-01-01
n4295(MT13649)	289	2017-01-01
n4295(MT13649)	239	2017-01-01
n4295(MT13649)	304	2017-01-01
n4295(MT13649)	322	2017-01-01
n4295(MT13649)	255	2017-01-01
n4295(MT13649)	293	2017-01-01
n4295(MT13649)	284	2017-01-01
n4295(MT13649)	279	2017-01-01
n4295(MT13649)	322	2017-01-01
n4295(MT13649)	279	2017-01-01
n4295(MT13649)	254	2017-01-01

## Sheet: Figure3c
strain	Normalized size	date
N2	1.07452	2018-12-09
N2	1.0003	2018-12-09
N2	1.04816	2018-12-09
N2	0.9559	2018-12-09
N2	0.966999	2018-12-09
N2	0.895549	2018-12-09
N2	1.02527	2018-12-09
N2	1.0003	2018-12-09
N2	0.939945	2018-12-09
N2	0.992665	2018-12-09
N2	0.889306	2018-12-09
N2	0.908729	2018-12-09
N2	0.961449	2018-12-09
N2	0.991971	2018-12-09
N2	0.989197	2018-12-09
N2	0.907342	2018-12-09
N2	1.044	2018-12-09
N2	1.02596	2018-12-09
N2	1.00515	2018-12-09
N2	0.987809	2018-12-09
N2	0.952431	2018-12-09
N2	0.893468	2018-12-09
N2	0.967692	2018-12-09
N2	1.08215	2018-12-09
N2	1.14736	2018-12-09
N2	1.00168	2018-12-09
N2	1.11545	2018-12-09
N2	1.01694	2018-12-09
N2	1.04539	2018-12-09
N2	1.10019	2018-12-09
N2	0.960062	2018-12-09
N2	0.80537	2018-12-09
N2	0.879594	2018-12-09
N2	1.0544	2018-12-09
N2	0.925377	2018-12-09
N2	1.16747	2018-12-09
N2	0.677038	2018-12-09
N2	0.985728	2018-12-09
N2	0.974629	2018-12-09
N2	0.980872	2018-12-09
N2	0.994052	2018-12-09
N2	0.92954	2018-12-09
N2	0.96353	2018-12-09
N2	1.05648	2018-12-09
N2	1.15846	2018-12-09
N2	1.02457	2018-12-09
N2	0.824793	2018-12-09
N2	0.956593	2018-12-09
N2	1.06342	2018-12-09
N2	1.06065	2018-12-09
N2	1.05302	2018-12-09
N2	1.02735	2018-12-09
N2	1.08215	2018-12-09
N2	1.13487	2018-12-09
N2	1.09256	2018-12-09
N2	1.11129	2018-12-09
N2	0.962143	2018-12-09
N2	1.08007	2018-12-09
N2	0.837279	2018-12-09
N2	1.11545	2018-12-09
N2	1.12793	2018-12-09
STOP18(PTM322)	0.546625	2018-12-09
STOP18(PTM322)	0.60975	2018-12-09
STOP18(PTM322)	0.638885	2018-12-09
STOP18(PTM322)	0.601426	2018-12-09
STOP18(PTM322)	0.522346	2018-12-09
STOP18(PTM322)	0.609056	2018-12-09
STOP18(PTM322)	0.565354	2018-12-09
STOP18(PTM322)	0.532751	2018-12-09
STOP18(PTM322)	0.631948	2018-12-09
STOP18(PTM322)	0.856702	2018-12-09
STOP18(PTM322)	0.6153	2018-12-09
STOP18(PTM322)	0.561192	2018-12-09
STOP18(PTM322)	0.650678	2018-12-09
STOP18(PTM322)	0.506391	2018-12-09
STOP18(PTM322)	0.611831	2018-12-09
STOP18(PTM322)	0.584777	2018-12-09
STOP18(PTM322)	0.597264	2018-12-09
STOP18(PTM322)	0.523733	2018-12-09
STOP18(PTM322)	0.539688	2018-12-09
STOP18(PTM322)	0.509859	2018-12-09
STOP18(PTM322)	0.595876	2018-12-09
STOP18(PTM322)	0.448815	2018-12-09
STOP18(PTM322)	0.442572	2018-12-09
STOP18(PTM322)	0.403725	2018-12-09
STOP18(PTM322)	0.455058	2018-12-09
STOP18(PTM322)	0.545237	2018-12-09
STOP18(PTM322)	0.55703	2018-12-09
STOP18(PTM322)	0.529976	2018-12-09
STOP18(PTM322)	0.506391	2018-12-09
STOP18(PTM322)	0.593102	2018-12-09
STOP18(PTM322)	0.663858	2018-12-09
STOP18(PTM322)	0.53067	2018-12-09
STOP18(PTM322)	0.525814	2018-12-09
STOP18(PTM322)	0.556336	2018-12-09
STOP18(PTM322)	0.493211	2018-12-09
STOP18(PTM322)	0.455752	2018-12-09
STOP18(PTM322)	0.624318	2018-12-09
STOP18(PTM322)	0.623624	2018-12-09
STOP18(PTM322)	0.626399	2018-12-09
STOP18(PTM322)	0.548012	2018-12-09
STOP18(PTM322)	0.638885	2018-12-09
STOP18(PTM322)	0.614606	2018-12-09
STOP18(PTM322)	0.585471	2018-12-09
STOP18(PTM322)	0.705479	2018-12-09
STOP18(PTM322)	0.561192	2018-12-09
STOP18(PTM322)	0.595183	2018-12-09
n4295(MT13649)	0.794271	2018-12-09
n4295(MT13649)	0.698542	2018-12-09
n4295(MT13649)	0.792883	2018-12-09
n4295(MT13649)	0.706173	2018-12-09
n4295(MT13649)	0.72074	2018-12-09
n4295(MT13649)	0.699929	2018-12-09
n4295(MT13649)	0.738082	2018-12-09
n4295(MT13649)	0.679812	2018-12-09
n4295(MT13649)	0.756118	2018-12-09
n4295(MT13649)	0.630561	2018-12-09
n4295(MT13649)	0.931621	2018-12-09
n4295(MT13649)	0.692993	2018-12-09
n4295(MT13649)	0.679812	2018-12-09
n4295(MT13649)	0.741551	2018-12-09
n4295(MT13649)	0.785946	2018-12-09
n4295(MT13649)	0.844216	2018-12-09
n4295(MT13649)	1.3513	2018-12-09
n4295(MT13649)	0.644434	2018-12-09
n4295(MT13649)	0.653452	2018-12-09
n4295(MT13649)	0.668714	2018-12-09
n4295(MT13649)	0.673569	2018-12-09
n4295(MT13649)	0.67565	2018-12-09
n4295(MT13649)	0.717272	2018-12-09
n4295(MT13649)	0.75265	2018-12-09
n4295(MT13649)	0.713803	2018-12-09
n4295(MT13649)	0.728371	2018-12-09
n4295(MT13649)	0.637498	2018-12-09
n4295(MT13649)	0.674263	2018-12-09
n4295(MT13649)	0.625705	2018-12-09
n4295(MT13649)	0.624318	2018-12-09
n4295(MT13649)	0.620849	2018-12-09
n4295(MT13649)	0.624318	2018-12-09
n4295(MT13649)	0.615993	2018-12-09
n4295(MT13649)	0.652065	2018-12-09
n4295(MT13649)	0.706173	2018-12-09
n4295(MT13649)	0.682587	2018-12-09
n4295(MT13649)	0.612525	2018-12-09
n4295(MT13649)	0.638191	2018-12-09
n4295(MT13649)	0.670101	2018-12-09
n4295(MT13649)	0.654146	2018-12-09
n4295(MT13649)	0.781784	2018-12-09
n4295(MT13649)	0.664551	2018-12-09
n4295(MT13649)	0.665245	2018-12-09
n4295(MT13649)	0.726289	2018-12-09
n4295(MT13649)	0.619462	2018-12-09
n4295(MT13649)	0.604201	2018-12-09
n4295(MT13649)	0.663858	2018-12-09
n4295(MT13649)	0.683975	2018-12-09
n4295(MT13649)	0.688137	2018-12-09
n4295(MT13649)	0.697155	2018-12-09
n4295(MT13649)	0.57576	2018-12-09
n4295(MT13649)	0.705479	2018-12-09
n4295(MT13649)	0.737388	2018-12-09
n4295(MT13649)	0.711028	2018-12-09
n4295(MT13649)	0.652065	2018-12-09
n4295(MT13649)	0.692299	2018-12-09
n4295(MT13649)	0.597958	2018-12-09
n4295(MT13649)	0.708254	2018-12-09
n4295(MT13649)	0.665939	2018-12-09
n4295(MT13649)	0.663858	2018-12-09
n4295(MT13649)	0.639579	2018-12-09
n4295(MT13649)	0.710335	2018-12-09
n4295(MT13649)	0.642353	2018-12-09
n4295(MT13649)	0.688137	2018-12-09
n4295(MT13649)	0.695767	2018-12-09
n4295(MT13649)	0.658308	2018-12-09
n4295(MT13649)	0.661083	2018-12-09
n4295(MT13649)	0.659696	2018-12-09
n4295(MT13649)	0.56258	2018-12-09
n4295(MT13649)	1.03221	2018-12-09
n4295(MT13649)	0.676344	2018-12-09
n4295(MT13649)	0.690218	2018-12-09
n4295(MT13649)	0.661083	2018-12-09
n4295(MT13649)	0.719353	2018-12-09
n4295(MT13649)	0.726983	2018-12-09
n4295(MT13649)	0.711722	2018-12-09
n4295(MT13649)	0.64166	2018-12-09
n4295(MT13649)	0.706173	2018-12-09
N2	0.911793	2018-12-02
N2	0.986183	2018-12-02
N2	0.939092	2018-12-02
N2	1.05921	2018-12-02
N2	1.00666	2018-12-02
N2	0.986183	2018-12-02
N2	1.08855	2018-12-02
N2	0.945917	2018-12-02
N2	1.07695	2018-12-02
N2	0.974581	2018-12-02
N2	0.942504	2018-12-02
N2	0.99642	2018-12-02
N2	0.971168	2018-12-02
N2	1.00188	2018-12-02
N2	0.915205	2018-12-02
N2	0.974581	2018-12-02
N2	0.926807	2018-12-02
N2	1.02508	2018-12-02
N2	1.04556	2018-12-02
N2	0.947964	2018-12-02
N2	0.844227	2018-12-02
N2	1.03259	2018-12-02
N2	0.960931	2018-12-02
N2	1.0285	2018-12-02
N2	1.1957	2018-12-02
N2	1.0087	2018-12-02
N2	1.02099	2018-12-02
N2	1.03942	2018-12-02
N2	1.01553	2018-12-02
N2	1.10357	2018-12-02
N2	1.12404	2018-12-02
N2	0.980041	2018-12-02
N2	0.945917	2018-12-02
N2	0.983453	2018-12-02
N2	0.983453	2018-12-02
N2	0.982088	2018-12-02
N2	1.06467	2018-12-02
N2	1.02031	2018-12-02
N2	0.787581	2018-12-02
N2	0.98823	2018-12-02
N2	0.866067	2018-12-02
N2	1.0558	2018-12-02
N2	0.90292	2018-12-02
N2	0.970486	2018-12-02
N2	0.953424	2018-12-02
N2	1.05648	2018-12-02
N2	1.02645	2018-12-02
N2	0.983453	2018-12-02
N2	0.809421	2018-12-02
N2	1.10562	2018-12-02
N2	1.03123	2018-12-02
N2	1.02235	2018-12-02
STOP15(PTM319)	0.565093	2018-12-02
STOP15(PTM319)	0.558951	2018-12-02
STOP15(PTM319)	0.573965	2018-12-02
STOP15(PTM319)	0.576013	2018-12-02
STOP15(PTM319)	0.524827	2018-12-02
STOP15(PTM319)	0.468181	2018-12-02
STOP15(PTM319)	0.461356	2018-12-02
STOP15(PTM319)	0.531652	2018-12-02
STOP15(PTM319)	0.5726	2018-12-02
STOP15(PTM319)	0.541889	2018-12-02
STOP15(PTM319)	0.584203	2018-12-02
STOP15(PTM319)	0.595122	2018-12-02
STOP15(PTM319)	0.615597	2018-12-02
STOP15(PTM319)	0.515955	2018-12-02
STOP15(PTM319)	0.571918	2018-12-02
STOP15(PTM319)	0.620374	2018-12-02
STOP15(PTM319)	0.608089	2018-12-02
STOP15(PTM319)	0.677702	2018-12-02
STOP15(PTM319)	0.518002	2018-12-02
STOP15(PTM319)	0.631976	2018-12-02
STOP15(PTM319)	0.623104	2018-12-02
STOP15(PTM319)	0.65245	2018-12-02
STOP15(PTM319)	0.458626	2018-12-02
STOP15(PTM319)	0.610819	2018-12-02
STOP15(PTM319)	0.51732	2018-12-02
STOP15(PTM319)	0.672925	2018-12-02
STOP15(PTM319)	0.581473	2018-12-02
STOP15(PTM319)	0.627881	2018-12-02
STOP15(PTM319)	0.494798	2018-12-02
STOP15(PTM319)	0.593757	2018-12-02
STOP15(PTM319)	0.540524	2018-12-02
STOP15(PTM319)	0.497528	2018-12-02
STOP15(PTM319)	0.573965	2018-12-02
STOP15(PTM319)	0.489338	2018-12-02
STOP15(PTM319)	0.565776	2018-12-02
STOP15(PTM319)	0.609454	2018-12-02
STOP15(PTM319)	0.56987	2018-12-02
STOP15(PTM319)	0.634706	2018-12-02
STOP15(PTM319)	0.593075	2018-12-02
STOP15(PTM319)	0.687257	2018-12-02
STOP15(PTM319)	0.609454	2018-12-02
STOP15(PTM319)	0.612184	2018-12-02
STOP15(PTM319)	0.560998	2018-12-02
STOP15(PTM319)	0.544619	2018-12-02
STOP15(PTM319)	0.618327	2018-12-02
STOP15(PTM319)	0.633341	2018-12-02
STOP15(PTM319)	0.606042	2018-12-02
STOP15(PTM319)	0.601265	2018-12-02
STOP15(PTM319)	0.561681	2018-12-02
STOP15(PTM319)	0.526192	2018-12-02
STOP15(PTM319)	0.631294	2018-12-02
STOP15(PTM319)	0.617644	2018-12-02
STOP15(PTM319)	0.639483	2018-12-02
STOP15(PTM319)	0.618327	2018-12-02
STOP15(PTM319)	0.686574	2018-12-02
STOP15(PTM319)	0.560316	2018-12-02
STOP15(PTM319)	0.642213	2018-12-02
STOP15(PTM319)	0.635388	2018-12-02
STOP15(PTM319)	0.590345	2018-12-02
STOP15(PTM319)	0.608089	2018-12-02
STOP15(PTM319)	0.541206	2018-12-02
STOP15(PTM319)	0.67702	2018-12-02
STOP26(PTM203)	0.692717	2018-12-02
STOP26(PTM203)	0.871526	2018-12-02
STOP26(PTM203)	0.675655	2018-12-02
STOP26(PTM203)	0.698859	2018-12-02
STOP26(PTM203)	0.733666	2018-12-02
STOP26(PTM203)	0.749363	2018-12-02
STOP26(PTM203)	0.612184	2018-12-02
STOP26(PTM203)	0.662005	2018-12-02
STOP26(PTM203)	0.752775	2018-12-02
STOP26(PTM203)	0.607407	2018-12-02
STOP26(PTM203)	0.723428	2018-12-02
STOP26(PTM203)	0.720698	2018-12-02
STOP26(PTM203)	0.763012	2018-12-02
STOP26(PTM203)	0.651768	2018-12-02
STOP26(PTM203)	0.446342	2018-12-02
STOP26(PTM203)	0.723428	2018-12-02
STOP26(PTM203)	0.698859	2018-12-02
STOP26(PTM203)	0.692034	2018-12-02
STOP26(PTM203)	0.754822	2018-12-02
STOP26(PTM203)	0.622421	2018-12-02
STOP26(PTM203)	0.642896	2018-12-02
STOP26(PTM203)	0.571918	2018-12-02
STOP26(PTM203)	0.720016	2018-12-02
STOP26(PTM203)	0.795089	2018-12-02
STOP26(PTM203)	0.728206	2018-12-02
STOP26(PTM203)	0.736395	2018-12-02
STOP26(PTM203)	0.76233	2018-12-02
STOP26(PTM203)	0.582838	2018-12-02
STOP26(PTM203)	0.579425	2018-12-02
STOP26(PTM203)	0.620374	2018-12-02
STOP26(PTM203)	0.806008	2018-12-02
STOP26(PTM203)	0.702954	2018-12-02
STOP26(PTM203)	0.766425	2018-12-02
STOP26(PTM203)	0.717969	2018-12-02
STOP26(PTM203)	0.761647	2018-12-02
STOP26(PTM203)	0.720016	2018-12-02
STOP26(PTM203)	0.723428	2018-12-02
STOP26(PTM203)	0.679067	2018-12-02
STOP26(PTM203)	0.674972	2018-12-02
STOP26(PTM203)	0.75141	2018-12-02
STOP26(PTM203)	0.670877	2018-12-02
STOP26(PTM203)	0.560316	2018-12-02
STOP26(PTM203)	0.456579	2018-12-02
STOP26(PTM203)	0.628564	2018-12-02
STOP26(PTM203)	0.779392	2018-12-02
STOP26(PTM203)	0.68248	2018-12-02
STOP26(PTM203)	0.612184	2018-12-02
STOP26(PTM203)	0.756187	2018-12-02
STOP26(PTM203)	0.752092	2018-12-02
STOP26(PTM203)	0.768472	2018-12-02
STOP26(PTM203)	0.752092	2018-12-02
STOP26(PTM203)	0.811468	2018-12-02
STOP26(PTM203)	0.775979	2018-12-02
STOP26(PTM203)	0.777344	2018-12-02
STOP26(PTM203)	0.667465	2018-12-02
STOP26(PTM203)	0.823753	2018-12-02
STOP26(PTM203)	0.563728	2018-12-02
STOP26(PTM203)	0.625151	2018-12-02
STOP26(PTM203)	0.672925	2018-12-02
STOP2all(PTM332)	0.637436	2018-12-02
STOP2all(PTM332)	0.556221	2018-12-02
STOP2all(PTM332)	0.408123	2018-12-02
STOP2all(PTM332)	0.715239	2018-12-02
STOP2all(PTM332)	0.687257	2018-12-02
STOP2all(PTM332)	0.647673	2018-12-02
STOP2all(PTM332)	0.685892	2018-12-02
STOP2all(PTM332)	0.784169	2018-12-02
STOP2all(PTM332)	0.661323	2018-12-02
STOP2all(PTM332)	0.688622	2018-12-02
STOP2all(PTM332)	0.669512	2018-12-02
STOP2all(PTM332)	0.672925	2018-12-02
STOP2all(PTM332)	0.568505	2018-12-02
STOP2all(PTM332)	0.681115	2018-12-02
STOP2all(PTM332)	0.706366	2018-12-02
STOP2all(PTM332)	0.758917	2018-12-02
STOP2all(PTM332)	0.551444	2018-12-02
STOP2all(PTM332)	0.642213	2018-12-02
STOP2all(PTM332)	0.536429	2018-12-02
STOP2all(PTM332)	0.508447	2018-12-02
STOP2all(PTM332)	0.610819	2018-12-02
STOP2all(PTM332)	0.639483	2018-12-02
STOP2all(PTM332)	0.692717	2018-12-02
STOP2all(PTM332)	0.702271	2018-12-02
STOP2all(PTM332)	0.58898	2018-12-02
STOP2all(PTM332)	0.455896	2018-12-02
STOP2all(PTM332)	0.698177	2018-12-02
STOP2all(PTM332)	0.662005	2018-12-02
STOP2all(PTM332)	0.698177	2018-12-02
STOP2all(PTM332)	0.688622	2018-12-02
STOP2all(PTM332)	0.672925	2018-12-02
STOP2all(PTM332)	0.656545	2018-12-02
STOP2all(PTM332)	0.711826	2018-12-02
STOP2all(PTM332)	0.709779	2018-12-02
STOP2all(PTM332)	0.725476	2018-12-02
STOP2all(PTM332)	0.634024	2018-12-02
STOP2all(PTM332)	0.619691	2018-12-02
STOP2all(PTM332)	0.5999	2018-12-02
STOP2all(PTM332)	0.614232	2018-12-02
STOP2all(PTM332)	0.51732	2018-12-02
STOP2all(PTM332)	0.544619	2018-12-02
STOP2all(PTM332)	0.569188	2018-12-02
STOP2all(PTM332)	0.750045	2018-12-02
STOP2all(PTM332)	0.677702	2018-12-02
STOP2all(PTM332)	0.470228	2018-12-02
STOP2all(PTM332)	0.657228	2018-12-02
STOP2all(PTM332)	0.612184	2018-12-02
STOP2all(PTM332)	0.655863	2018-12-02
STOP2all(PTM332)	0.212251	2018-12-02
STOP2all(PTM332)	0.659275	2018-12-02
STOP2all(PTM332)	0.674972	2018-12-02
N2	0.995309	2019-02-09
N2	1.00995	2019-02-09
N2	1.00425	2019-02-09
N2	0.785513	2019-02-09
N2	0.865203	2019-02-09
N2	0.901795	2019-02-09
N2	0.985551	2019-02-09
N2	1.47263	2019-02-09
N2	0.909927	2019-02-09
N2	0.953024	2019-02-09
N2	0.94164	2019-02-09
N2	0.979859	2019-02-09
N2	0.8156	2019-02-09
N2	1.03841	2019-02-09
N2	1.0441	2019-02-09
N2	1.09695	2019-02-09
N2	1.00995	2019-02-09
N2	0.97498	2019-02-09
N2	0.943266	2019-02-09
N2	0.938387	2019-02-09
N2	0.900169	2019-02-09
N2	0.982298	2019-02-09
N2	1.02865	2019-02-09
N2	1.03109	2019-02-09
N2	1.07988	2019-02-09
N2	1.03353	2019-02-09
N2	0.983924	2019-02-09
N2	1.14737	2019-02-09
N2	0.935948	2019-02-09
N2	1.05792	2019-02-09
N2	0.920498	2019-02-09
N2	0.943266	2019-02-09
N2	0.964409	2019-02-09
N2	1.10509	2019-02-09
N2	1.05548	2019-02-09
N2	0.912366	2019-02-09
N2	0.940014	2019-02-09
N2	1.03922	2019-02-09
N2	1.00507	2019-02-09
N2	1.00669	2019-02-09
N2	1.0872	2019-02-09
N2	1.07825	2019-02-09
N2	1.1124	2019-02-09
N2	1.0815	2019-02-09
N2	1.0872	2019-02-09
N2	1.04898	2019-02-09
N2	0.866016	2019-02-09
N2	1.02946	2019-02-09
N2	1.03597	2019-02-09
N2	1.02296	2019-02-09
N2	0.940014	2019-02-09
N2	0.909927	2019-02-09
N2	1.00263	2019-02-09
N2	0.980672	2019-02-09
N2	0.911553	2019-02-09
N2	0.966035	2019-02-09
N2	1.01564	2019-02-09
N2	1.05955	2019-02-09
N2	1.07988	2019-02-09
N2	0.939201	2019-02-09
N2	1.09614	2019-02-09
N2	1.00669	2019-02-09
N2	0.983924	2019-02-09
N2	0.878214	2019-02-09
N2	1.04085	2019-02-09
STOP1(PTM316 )	0.996935	2019-02-09
STOP1(PTM316 )	0.914806	2019-02-09
STOP1(PTM316 )	0.939201	2019-02-09
STOP1(PTM316 )	0.906674	2019-02-09
STOP1(PTM316 )	0.865203	2019-02-09
STOP1(PTM316 )	0.905048	2019-02-09
STOP1(PTM316 )	1.16201	2019-02-09
STOP1(PTM316 )	0.996935	2019-02-09
STOP1(PTM316 )	0.892037	2019-02-09
STOP1(PTM316 )	0.953024	2019-02-09
STOP1(PTM316 )	1.06443	2019-02-09
STOP1(PTM316 )	0.887971	2019-02-09
STOP1(PTM316 )	1.00995	2019-02-09
STOP1(PTM316 )	0.809095	2019-02-09
STOP1(PTM316 )	0.978232	2019-02-09
STOP1(PTM316 )	0.996935	2019-02-09
STOP1(PTM316 )	0.764371	2019-02-09
STOP1(PTM316 )	0.901795	2019-02-09
STOP1(PTM316 )	0.790392	2019-02-09
STOP1(PTM316 )	1.00751	2019-02-09
STOP1(PTM316 )	0.974167	2019-02-09
STOP1(PTM316 )	0.930256	2019-02-09
STOP1(PTM316 )	0.84894	2019-02-09
STOP1(PTM316 )	0.889598	2019-02-09
STOP1(PTM316 )	0.898543	2019-02-09
STOP1(PTM316 )	0.965222	2019-02-09
STOP1(PTM316 )	0.952211	2019-02-09
STOP1(PTM316 )	1.03353	2019-02-09
STOP1(PTM316 )	1.01239	2019-02-09
STOP1(PTM316 )	0.977419	2019-02-09
STOP1(PTM316 )	0.971727	2019-02-09
STOP1(PTM316 )	1.09126	2019-02-09
STOP1(PTM316 )	0.851379	2019-02-09
STOP1(PTM316 )	0.916432	2019-02-09
STOP1(PTM316 )	0.983111	2019-02-09
STOP1(PTM316 )	0.960343	2019-02-09
STOP1(PTM316 )	0.945706	2019-02-09
STOP1(PTM316 )	0.89285	2019-02-09
STOP1(PTM316 )	0.974167	2019-02-09
STOP1(PTM316 )	0.898543	2019-02-09
STOP1(PTM316 )	0.91074	2019-02-09
STOP1(PTM316 )	1.00344	2019-02-09
STOP1(PTM316 )	1.01645	2019-02-09
STOP1(PTM316 )	0.909927	2019-02-09
STOP1(PTM316 )	0.840808	2019-02-09
STOP1(PTM316 )	0.844061	2019-02-09
STOP1(PTM316 )	0.966848	2019-02-09
STOP1(PTM316 )	0.938387	2019-02-09
STOP1(PTM316 )	0.989617	2019-02-09
STOP1(PTM316 )	0.97498	2019-02-09
STOP1(PTM316 )	1.00263	2019-02-09
STOP1(PTM316 )	0.979045	2019-02-09
STOP1(PTM316 )	0.807469	2019-02-09
STOP1(PTM316 )	0.933508	2019-02-09
STOP1(PTM316 )	0.918058	2019-02-09
STOP19(PTM325 )	0.533433	2019-02-09
STOP19(PTM325 )	0.559455	2019-02-09
STOP19(PTM325 )	0.54807	2019-02-09
STOP19(PTM325 )	0.494402	2019-02-09
STOP19(PTM325 )	0.425283	2019-02-09
STOP19(PTM325 )	0.422844	2019-02-09
STOP19(PTM325 )	0.340714	2019-02-09
STOP19(PTM325 )	0.512291	2019-02-09
STOP19(PTM325 )	0.625321	2019-02-09
STOP19(PTM325 )	0.502533	2019-02-09
STOP19(PTM325 )	0.51717	2019-02-09
STOP19(PTM325 )	0.510665	2019-02-09
STOP19(PTM325 )	0.471633	2019-02-09
STOP19(PTM325 )	0.402515	2019-02-09
STOP19(PTM325 )	0.449678	2019-02-09
STOP19(PTM325 )	0.461062	2019-02-09
STOP19(PTM325 )	0.55051	2019-02-09
STOP19(PTM325 )	0.539939	2019-02-09
STOP19(PTM325 )	0.456183	2019-02-09
STOP19(PTM325 )	0.543191	2019-02-09
STOP19(PTM325 )	0.579784	2019-02-09
STOP19(PTM325 )	0.428536	2019-02-09
STOP19(PTM325 )	0.399262	2019-02-09
STOP19(PTM325 )	0.544818	2019-02-09
STOP19(PTM325 )	0.589542	2019-02-09
STOP19(PTM325 )	0.548883	2019-02-09
STOP19(PTM325 )	0.357791	2019-02-09
STOP19(PTM325 )	0.516357	2019-02-09
STOP19(PTM325 )	0.512291	2019-02-09
STOP19(PTM325 )	0.441546	2019-02-09
STOP19(PTM325 )	0.526115	2019-02-09
STOP19(PTM325 )	0.382999	2019-02-09
STOP19(PTM325 )	0.323638	2019-02-09
STOP19(PTM325 )	0.474073	2019-02-09
STOP19(PTM325 )	0.478138	2019-02-09
STOP19(PTM325 )	0.493589	2019-02-09
STOP19(PTM325 )	0.471633	2019-02-09
STOP19(PTM325 )	0.433415	2019-02-09
STOP19(PTM325 )	0.372428	2019-02-09
STOP19(PTM325 )	0.495215	2019-02-09
STOP19(PTM325 )	0.404141	2019-02-09
STOP19(PTM325 )	0.494402	2019-02-09
STOP19(PTM325 )	0.349659	2019-02-09
STOP19(PTM325 )	0.522049	2019-02-09
STOP19(PTM325 )	0.56596	2019-02-09
STOP19(PTM325 )	0.421217	2019-02-09
STOP19(PTM325 )	0.686308	2019-02-09
STOP19(PTM325 )	0.470007	2019-02-09
STOP19(PTM325 )	0.25208	2019-02-09
STOP19(PTM325 )	0.604992	2019-02-09
STOP19(PTM325 )	0.602552	2019-02-09
STOP19(PTM325 )	0.414712	2019-02-09
STOP19(PTM325 )	0.580597	2019-02-09
STOP19(PTM325 )	0.603365	2019-02-09
STOP19(PTM325 )	0.618815	2019-02-09
STOP19(PTM325 )	0.310627	2019-02-09
STOP19(PTM325 )	0.399262	2019-02-09
STOP19(PTM325 )	0.426909	2019-02-09
STOP19(PTM325 )	0.396009	2019-02-09
STOP19(PTM325 )	0.45537	2019-02-09
STOP19(PTM325 )	0.565147	2019-02-09
STOP19(PTM325 )	0.601739	2019-02-09
STOP19(PTM325 )	0.449678	2019-02-09
STOP19(PTM325 )	0.528554	2019-02-09
STOP19(PTM325 )	0.449678	2019-02-09
STOP19(PTM325 )	0.494402	2019-02-09
STOP19(PTM325 )	0.303309	2019-02-09
STOP19(PTM325 )	0.510665	2019-02-09
STOP19(PTM325 )	0.503346	2019-02-09
STOP19(PTM325 )	0.309001	2019-02-09
STOP19(PTM325 )	0.534247	2019-02-09
STOP19(PTM325 )	0.487896	2019-02-09
STOP19(PTM325 )	0.577344	2019-02-09
STOP19(PTM325 )	0.47082	2019-02-09
STOP19(PTM325 )	0.535873	2019-02-09
STOP19(PTM325 )	0.430162	2019-02-09
STOP19(PTM325 )	0.471633	2019-02-09
STOP2(PTM317 )	0.992869	2019-02-09
STOP2(PTM317 )	0.986364	2019-02-09
STOP2(PTM317 )	0.796897	2019-02-09
STOP2(PTM317 )	0.857885	2019-02-09
STOP2(PTM317 )	1.0254	2019-02-09
STOP2(PTM317 )	0.891224	2019-02-09
STOP2(PTM317 )	0.889598	2019-02-09
STOP2(PTM317 )	0.871708	2019-02-09
STOP2(PTM317 )	0.969288	2019-02-09
STOP2(PTM317 )	0.916432	2019-02-09
STOP2(PTM317 )	0.956277	2019-02-09
STOP2(PTM317 )	1.02052	2019-02-09
STOP2(PTM317 )	1.10102	2019-02-09
STOP2(PTM317 )	0.651342	2019-02-09
STOP2(PTM317 )	0.9083	2019-02-09
STOP2(PTM317 )	0.785513	2019-02-09
STOP2(PTM317 )	1.04329	2019-02-09
STOP2(PTM317 )	0.923751	2019-02-09
STOP2(PTM317 )	0.887971	2019-02-09
STOP2(PTM317 )	0.92863	2019-02-09
STOP2(PTM317 )	1.01564	2019-02-09
STOP2(PTM317 )	0.924564	2019-02-09
STOP2(PTM317 )	0.98799	2019-02-09
STOP2(PTM317 )	0.913993	2019-02-09
STOP2(PTM317 )	1.00019	2019-02-09
STOP2(PTM317 )	0.822105	2019-02-09
STOP2(PTM317 )	0.906674	2019-02-09
STOP2(PTM317 )	0.915619	2019-02-09
STOP2(PTM317 )	0.993682	2019-02-09
STOP2(PTM317 )	0.961969	2019-02-09
STOP2(PTM317 )	0.996122	2019-02-09
STOP2(PTM317 )	1.01401	2019-02-09
STOP2(PTM317 )	1.00832	2019-02-09
STOP2(PTM317 )	0.89285	2019-02-09
STOP2(PTM317 )	0.945706	2019-02-09
STOP2(PTM317 )	0.991243	2019-02-09
STOP2(PTM317 )	0.905048	2019-02-09
STOP2(PTM317 )	0.829424	2019-02-09
STOP2(PTM317 )	0.975793	2019-02-09
STOP2(PTM317 )	0.919685	2019-02-09
STOP2(PTM317 )	0.783887	2019-02-09
STOP2(PTM317 )	0.943266	2019-02-09
STOP2(PTM317 )	0.919685	2019-02-09
STOP2(PTM317 )	0.835929	2019-02-09
STOP2(PTM317 )	0.958716	2019-02-09
STOP2(PTM317 )	0.973353	2019-02-09
STOP2(PTM317 )	1.00019	2019-02-09
STOP2(PTM317 )	0.934322	2019-02-09
STOP2(PTM317 )	0.922124	2019-02-09
STOP2(PTM317 )	0.91074	2019-02-09
STOP2(PTM317 )	0.929443	2019-02-09
STOP2(PTM317 )	0.932695	2019-02-09
STOP2(PTM317 )	1.05467	2019-02-09
STOP2(PTM317 )	0.961156	2019-02-09
STOP2(PTM317 )	0.857071	2019-02-09
STOP2(PTM317 )	0.94164	2019-02-09
STOP2(PTM317 )	0.925377	2019-02-09
STOP2(PTM317 )	1.02458	2019-02-09
STOP2(PTM317 )	0.979045	2019-02-09
STOP2(PTM317 )	1.05223	2019-02-09
STOP23(PTM98 )	1.10509	2019-02-09
STOP23(PTM98 )	0.996122	2019-02-09
STOP23(PTM98 )	0.991243	2019-02-09
STOP23(PTM98 )	1.02865	2019-02-09
STOP23(PTM98 )	1.05304	2019-02-09
STOP23(PTM98 )	1.01564	2019-02-09
STOP23(PTM98 )	0.693626	2019-02-09
STOP23(PTM98 )	1.04816	2019-02-09
STOP23(PTM98 )	1.01076	2019-02-09
STOP23(PTM98 )	0.963595	2019-02-09
STOP23(PTM98 )	1.02458	2019-02-09
STOP23(PTM98 )	1.05142	2019-02-09
STOP23(PTM98 )	1.07662	2019-02-09
STOP23(PTM98 )	1.11322	2019-02-09
STOP23(PTM98 )	0.992869	2019-02-09
STOP23(PTM98 )	1.12379	2019-02-09
STOP23(PTM98 )	1.13029	2019-02-09
STOP23(PTM98 )	1.08069	2019-02-09
STOP23(PTM98 )	1.11484	2019-02-09
STOP23(PTM98 )	1.02702	2019-02-09
STOP23(PTM98 )	0.905861	2019-02-09
STOP23(PTM98 )	1.01645	2019-02-09
STOP23(PTM98 )	0.99043	2019-02-09
STOP23(PTM98 )	1.05304	2019-02-09
STOP23(PTM98 )	1.17908	2019-02-09
STOP23(PTM98 )	1.06931	2019-02-09
STOP23(PTM98 )	1.09533	2019-02-09
STOP23(PTM98 )	0.922124	2019-02-09
STOP23(PTM98 )	0.947332	2019-02-09
STOP23(PTM98 )	0.979859	2019-02-09
STOP23(PTM98 )	0.969288	2019-02-09
STOP23(PTM98 )	1.04247	2019-02-09
STOP23(PTM98 )	1.08964	2019-02-09
STOP23(PTM98 )	0.970101	2019-02-09
STOP23(PTM98 )	0.966035	2019-02-09
STOP23(PTM98 )	1.08394	2019-02-09
STOP23(PTM98 )	0.973353	2019-02-09
STOP23(PTM98 )	1.00913	2019-02-09
STOP23(PTM98 )	1.00019	2019-02-09
STOP23(PTM98 )	1.00507	2019-02-09
STOP23(PTM98 )	1.1368	2019-02-09
STOP23(PTM98 )	1.00832	2019-02-09
STOP23(PTM98 )	1.09777	2019-02-09
STOP23(PTM98 )	1.05304	2019-02-09
STOP23(PTM98 )	1.0132	2019-02-09
STOP23(PTM98 )	1.19128	2019-02-09
STOP23(PTM98 )	1.00263	2019-02-09
STOP23(PTM98 )	0.987177	2019-02-09
STOP23(PTM98 )	1.27748	2019-02-09
STOP23(PTM98 )	1.05142	2019-02-09
STOP23(PTM98 )	0.950585	2019-02-09
STOP23(PTM98 )	1.04085	2019-02-09
STOP23(PTM98 )	1.02946	2019-02-09
STOP23(PTM98 )	1.04735	2019-02-09
STOP23(PTM98 )	1.10346	2019-02-09
STOP23(PTM98 )	1.12379	2019-02-09
STOP23(PTM98 )	1.01808	2019-02-09
STOP23(PTM98 )	1.01401	2019-02-09
STOP23(PTM98 )	1.10752	2019-02-09
STOP23(PTM98 )	0.874961	2019-02-09
STOP23(PTM98 )	0.973353	2019-02-09
STOP23(PTM98 )	1.09614	2019-02-09
STOP23(PTM98 )	1.075	2019-02-09
STOP23(PTM98 )	0.979859	2019-02-09
STOP23(PTM98 )	1.00181	2019-02-09
STOP23(PTM98 )	0.983924	2019-02-09
STOP23(PTM98 )	1.01239	2019-02-09
STOP23(PTM98 )	0.865203	2019-02-09
STOP23(PTM98 )	0.97254	2019-02-09
STOP23(PTM98 )	1.0628	2019-02-09
STOP23(PTM98 )	1.04735	2019-02-09
STOP23(PTM98 )	1.06036	2019-02-09
STOP23(PTM98 )	1.12948	2019-02-09
STOP7(PTM487 )	0.580597	2019-02-09
STOP7(PTM487 )	0.719647	2019-02-09
STOP7(PTM487 )	0.7847	2019-02-09
STOP7(PTM487 )	0.789579	2019-02-09
STOP7(PTM487 )	0.840808	2019-02-09
STOP7(PTM487 )	0.737537	2019-02-09
STOP7(PTM487 )	0.757053	2019-02-09
STOP7(PTM487 )	0.698505	2019-02-09
STOP7(PTM487 )	0.748921	2019-02-09
STOP7(PTM487 )	0.641584	2019-02-09
STOP7(PTM487 )	0.779008	2019-02-09
STOP7(PTM487 )	0.771689	2019-02-09
STOP7(PTM487 )	0.839995	2019-02-09
STOP7(PTM487 )	0.755426	2019-02-09
STOP7(PTM487 )	0.731031	2019-02-09
STOP7(PTM487 )	0.819666	2019-02-09
STOP7(PTM487 )	0.780634	2019-02-09
STOP7(PTM487 )	0.593607	2019-02-09
STOP7(PTM487 )	0.604178	2019-02-09
STOP7(PTM487 )	0.678989	2019-02-09
STOP7(PTM487 )	0.675737	2019-02-09
STOP7(PTM487 )	0.430975	2019-02-09
STOP7(PTM487 )	0.871708	2019-02-09
STOP7(PTM487 )	0.721274	2019-02-09
STOP7(PTM487 )	0.671671	2019-02-09
STOP7(PTM487 )	0.709076	2019-02-09
STOP7(PTM487 )	0.799337	2019-02-09
STOP7(PTM487 )	0.792019	2019-02-09
STOP7(PTM487 )	0.829424	2019-02-09
STOP7(PTM487 )	0.816413	2019-02-09
STOP7(PTM487 )	0.772503	2019-02-09
STOP7(PTM487 )	0.731845	2019-02-09
STOP7(PTM487 )	0.770876	2019-02-09
STOP7(PTM487 )	0.692	2019-02-09
STOP7(PTM487 )	0.771689	2019-02-09
STOP7(PTM487 )	0.828611	2019-02-09
STOP7(PTM487 )	0.723713	2019-02-09
STOP7(PTM487 )	0.747295	2019-02-09
STOP7(PTM487 )	0.648902	2019-02-09
STOP7(PTM487 )	0.879027	2019-02-09
STOP7(PTM487 )	0.687934	2019-02-09
STOP7(PTM487 )	0.691187	2019-02-09
STOP7(PTM487 )	0.709889	2019-02-09
STOP7(PTM487 )	0.750547	2019-02-09
STOP7(PTM487 )	0.719647	2019-02-09
STOP7(PTM487 )	0.788766	2019-02-09
STOP7(PTM487 )	0.793645	2019-02-09
STOP7(PTM487 )	0.709076	2019-02-09
STOP7(PTM487 )	0.736724	2019-02-09
STOP7(PTM487 )	0.713142	2019-02-09
STOP7(PTM487 )	0.713955	2019-02-09
STOP7(PTM487 )	0.698505	2019-02-09
STOP7(PTM487 )	0.799337	2019-02-09
STOP7(PTM487 )	0.792019	2019-02-09
STOP7(PTM487 )	0.829424	2019-02-09
STOP7(PTM487 )	0.816413	2019-02-09
STOP7(PTM487 )	0.772503	2019-02-09
STOP7(PTM487 )	0.731845	2019-02-09
STOP7(PTM487 )	0.770876	2019-02-09
STOP7(PTM487 )	0.692	2019-02-09
STOP7(PTM487 )	0.771689	2019-02-09
STOP7(PTM487 )	0.828611	2019-02-09
STOP7(PTM487 )	0.723713	2019-02-09
STOP7(PTM487 )	0.747295	2019-02-09
STOP7(PTM487 )	0.879027	2019-02-09
STOP7(PTM487 )	0.687934	2019-02-09
STOP7(PTM487 )	0.691187	2019-02-09
STOP7(PTM487 )	0.709889	2019-02-09
STOP7(PTM487 )	0.750547	2019-02-09
STOP7(PTM487 )	0.719647	2019-02-09
STOP7(PTM487 )	0.793645	2019-02-09
STOP7(PTM487 )	0.709076	2019-02-09
STOP7(PTM487 )	0.736724	2019-02-09
STOP7(PTM487 )	0.713142	2019-02-09
STOP7(PTM487 )	0.713955	2019-02-09
STOP7(PTM487 )	0.698505	2019-02-09

## Sheet: Figure3d
strain	0-24	24-48	48-72	72-96	date	genotype
N2	2.16667	7.375	4	0	2018-12-02	+
N2	1.83333	7.375	4.33333	0	2018-12-02	+
N2	1.625	7.33333	5.375	0.458333	2018-12-02	+
N2	1.70833	7.91667	3.16667	0.0416667	2018-12-02	+
N2	2.04167	7.91667	2.54167	0.166667	2018-12-02	+
N2	1.91667	7.91667	3.91667	0.0416667	2018-12-02	+
N2	2.54167	7.58333	4.5	0.0416667	2018-12-02	+
N2	2.125	6.91667	3.625	0.0833333	2018-12-02	+
N2	1.5	6.41667	4.70833	0.0416667	2018-12-02	+
N2	1.54167	7.91667	5.41667	0.0416667	2018-12-02	+
N2	2.20833	7.5	5.16667	0.375	2018-12-02	+
N2	2.08333	7.41667	3.79167	0	2018-12-02	+
n4295(MT13649)	0.833333	3.95833	4.58333	0.958333	2018-12-02	n4295
n4295(MT13649)	0.708333	4.08333	5.5	2.125	2018-12-02	n4295
n4295(MT13649)	0.583333	4	4.79167	3.54167	2018-12-02	n4295
n4295(MT13649)	0.791667	3.625	5.29167	1.75	2018-12-02	n4295
n4295(MT13649)	0.583333	3.54167	3.95833	0.25	2018-12-02	n4295
n4295(MT13649)	0.791667	4.33333	4.29167	4.04167	2018-12-02	n4295
n4295(MT13649)	0.833333	4.25	4.75	3.41667	2018-12-02	n4295
n4295(MT13649)	0.833333	3.875	4.08333	0.5	2018-12-02	n4295
n4295(MT13649)	0.75	4.08333	5.79167	2.54167	2018-12-02	n4295
n4295(MT13649)	0.708333	4	4.91667	2.875	2018-12-02	n4295
n4295(MT13649)	0.375	3.70833	4.375	4.20833	2018-12-02	n4295
n4295(MT13649)	0.833333	3.95833	3.125	0.0416667	2018-12-02	n4295
N2	1.95833	6.58333	3.45833	0	2018-11-28	+
N2	1.91667	6.83333	4.625	0.166667	2018-11-28	+
N2	1.95833	6.20833	4.83333	0.625	2018-11-28	+
N2	1.875	7.08333	3.70833	0.0833333	2018-11-28	+
N2	1.83333	4.70833	2.5	0.0833333	2018-11-28	+
N2	2.5	5.875	5.08333	0.0416667	2018-11-28	+
N2	2.25	6.375	3.625	0.166667	2018-11-28	+
N2	1.70833	6.79167	3.29167	0.208333	2018-11-28	+
N2	2.375	4.70833	4.375	0.0416667	2018-11-28	+
N2	1.79167	6.95833	5.29167	0.0833333	2018-11-28	+
N2	2.16667	6.79167	3.41667	0.125	2018-11-28	+
N2	1.875	6.54167	2.45833	0.0416667	2018-11-28	+
STOP26(PTM203 )	0	2.625	4.29167	5	2018-11-28	kah68
STOP26(PTM203 )	0.416667	3.29167	4.41667	3.5	2018-11-28	kah68
STOP26(PTM203 )	0.333333	2.875	4.375	5.45833	2018-11-28	kah68
STOP26(PTM203 )	0.208333	2.91667	4.16667	5.25	2018-11-28	kah68
STOP26(PTM203 )	0	2.58333	4.08333	4.08333	2018-11-28	kah68
STOP26(PTM203 )	0.375	3.45833	4.29167	2.58333	2018-11-28	kah68
STOP26(PTM203 )	0.208333	2.875	4.58333	3.375	2018-11-28	kah68
STOP26(PTM203 )	0.583333	2.91667	4.41667	2.875	2018-11-28	kah68
STOP26(PTM203 )	0.5	3.25	4.41667	6	2018-11-28	kah68
STOP26(PTM203 )	0	2.66667	4.08333	5.5	2018-11-28	kah68
STOP26(PTM203 )	0.458333	3.125	4.375	3.625	2018-11-28	kah68
STOP26(PTM203 )	0.208333	3.04167	3.79167	1.91667	2018-11-28	kah68
N2	2.20833	7.625	4.54167	1.45833	2017-03-04	+
N2	1.79167	7	4.375	0.208333	2017-03-04	+
N2	1.08333	7	6.5	0.5	2017-03-04	+
N2	1.625	7.58333	4.70833	0.0833333	2017-03-04	+
N2	1.83333	7.04167	4.91667	0.0833333	2017-03-04	+
N2	1.66667	6.75	4	0.0833333	2017-03-04	+
N2	1.83333	7.875	3.125	0.25	2017-03-04	+
N2	1.91667	7.625	3.79167	0.0416667	2017-03-04	+
N2	1.41667	7.5	4.04167	0.0833333	2017-03-04	+
N2	1.75	7.04167	4.91667	0.0833333	2017-03-04	+
N2	2.20833	7.08333	4.375	0.25	2017-03-04	+
N2	1.79167	7.16667	3.58333	0.0416667	2017-03-04	+
N2	1.375	7.875	5.125	0.0833333	2017-03-04	+
N2	2.20833	7.66667	4.875	0	2017-03-04	+
N2	1.875	7.70833	5.5	0	2017-03-04	+
N2	1.33333	6.45833	4.91667	0.208333	2017-03-04	+
n4295(MT13649)	0.666667	4.16667	4.375	1.66667	2017-03-04	n4295
n4295(MT13649)	0.916667	4.16667	5.625	3.125	2017-03-04	n4295
n4295(MT13649)	1	4.08333	4.58333	3.33333	2017-03-04	n4295
n4295(MT13649)	0.666667	3.75	5.45833	3	2017-03-04	n4295
n4295(MT13649)	0.708333	4.29167	5.29167	3.125	2017-03-04	n4295
n4295(MT13649)	0.375	3.70833	5.58333	5.41667	2017-03-04	n4295
n4295(MT13649)	0.833333	3.66667	5.375	2.29167	2017-03-04	n4295
n4295(MT13649)	1	3.875	5.91667	2.45833	2017-03-04	n4295
n4295(MT13649)	1.04167	4.54167	5.20833	0.666667	2017-03-04	n4295
n4295(MT13649)	0.541667	4	5.54167	4.875	2017-03-04	n4295
n4295(MT13649)	0.375	3.91667	5.375	3.625	2017-03-04	n4295
n4295(MT13649)	0	2.79167	4.16667	5	2017-03-04	n4295
n4295(MT13649)	1.125	4.375	5.41667	0.791667	2017-03-04	n4295
n4295(MT13649)	0.833333	4.125	5.625	1.08333	2017-03-04	n4295
n4295(MT13649)	0.708333	4.29167	6.08333	4.83333	2017-03-04	n4295
n4295(MT13649)	0.666667	4.33333	6.33333	3.58333	2017-03-04	n4295
