# Supplementary material for: Evolution of Yin and Yang isoforms of a chromatin remodeling subunit precedes the creation of two genes
Source: eLife. 2019 Sep 9;8:e48119. doi: 10.7554/eLife.48119 (PMC6752949; doi:10.7554/eLife.48119)
Supplement: Figure 4—source data 1. [file elife-48119-fig4-data1.xlsx]

## Sheet: Figure4b
strain	fecundity	date	genotype
N2	325	2018-12-02	+
N2	325	2018-12-02	+
N2	355	2018-12-02	+
N2	308	2018-12-02	+
N2	304	2018-12-02	+
N2	331	2018-12-02	+
N2	352	2018-12-02	+
N2	306	2018-12-02	+
N2	304	2018-12-02	+
N2	358	2018-12-02	+
N2	366	2018-12-02	+
N2	319	2018-12-02	+
STOP18	0	2018-12-02	kah96
STOP18	8	2018-12-02	kah96
STOP18	0	2018-12-02	kah96
STOP18	0	2018-12-02	kah96
STOP18	23	2018-12-02	kah96
STOP18	12	2018-12-02	kah96
STOP18	7	2018-12-02	kah96
STOP18	0	2018-12-02	kah96
STOP18	8	2018-12-02	kah96
STOP18	0	2018-12-02	kah96
STOP18	14	2018-12-02	kah96
STOP18	0	2018-12-02	kah96
STOP15	70	2018-12-02	kah93
STOP15	0	2018-12-02	kah93
STOP15	22	2018-12-02	kah93
STOP15	50	2018-12-02	kah93
STOP15	0	2018-12-02	kah93
STOP15	105	2018-12-02	kah93
STOP15	1	2018-12-02	kah93
STOP15	72	2018-12-02	kah93
STOP15	11	2018-12-02	kah93
STOP15	70	2018-12-02	kah93
STOP15	55	2018-12-02	kah93
STOP15	86	2018-12-02	kah93
STOP18het	333	2018-12-02	kah96/+
STOP18het	287	2018-12-02	kah96/+
STOP18het	330	2018-12-02	kah96/+
STOP18het	327	2018-12-02	kah96/+
STOP18het	317	2018-12-02	kah96/+
STOP18het	332	2018-12-02	kah96/+
STOP18het	284	2018-12-02	kah96/+
STOP18het	336	2018-12-02	kah96/+
STOP18het	358	2018-12-02	kah96/+
STOP18het	316	2018-12-02	kah96/+
STOP18het	310	2018-12-02	kah96/+
STOP15het	322	2018-12-02	kah93/+
STOP15het	311	2018-12-02	kah93/+
STOP15het	325	2018-12-02	kah93/+
STOP15het	209	2018-12-02	kah93/+
STOP15het	321	2018-12-02	kah93/+
STOP15het	341	2018-12-02	kah93/+
STOP15het	294	2018-12-02	kah93/+
STOP15het	277	2018-12-02	kah93/+
STOP15het	352	2018-12-02	kah93/+
STOP15het	253	2018-12-02	kah93/+
STOP15het	307	2018-12-02	kah93/+
STOP15het	296	2018-12-02	kah93/+
N2	288	2018-11-28	+
N2	325	2018-11-28	+
N2	327	2018-11-28	+
N2	306	2018-11-28	+
N2	219	2018-11-28	+
N2	324	2018-11-28	+
N2	298	2018-11-28	+
N2	288	2018-11-28	+
N2	276	2018-11-28	+
N2	339	2018-11-28	+
N2	300	2018-11-28	+
N2	262	2018-11-28	+
STOP15	164	2018-11-28	kah93
STOP15	94	2018-11-28	kah93
STOP15	105	2018-11-28	kah93
STOP15	25	2018-11-28	kah93
STOP15	31	2018-11-28	kah93
STOP15	148	2018-11-28	kah93
STOP15	96	2018-11-28	kah93
STOP15	82	2018-11-28	kah93
STOP15	12	2018-11-28	kah93
STOP15	173	2018-11-28	kah93
STOP15	205	2018-11-28	kah93
STOP15	47	2018-11-28	kah93
STOP2all	0	2018-11-28	kah106
STOP2all	0	2018-11-28	kah106
STOP2all	0	2018-11-28	kah106
STOP2all	0	2018-11-28	kah106
STOP2all	0	2018-11-28	kah106
STOP2all	0	2018-11-28	kah106
STOP2all	0	2018-11-28	kah106
STOP2all	0	2018-11-28	kah106
STOP2all	0	2018-11-28	kah106
STOP2all	0	2018-11-28	kah106
STOP2all	0	2018-11-28	kah106
STOP2all	0	2018-11-28	kah106
STOP2allhet	237	2018-11-28	kah106/+
STOP2allhet	335	2018-11-28	kah106/+
STOP2allhet	309	2018-11-28	kah106/+
STOP2allhet	290	2018-11-28	kah106/+
STOP2allhet	188	2018-11-28	kah106/+
STOP2allhet	318	2018-11-28	kah106/+
STOP2allhet	286	2018-11-28	kah106/+
STOP2allhet	311	2018-11-28	kah106/+
STOP2allhet	289	2018-11-28	kah106/+
STOP2allhet	290	2018-11-28	kah106/+
STOP2allhet	327	2018-11-28	kah106/+
STOP2allhet	348	2018-11-28	kah106/+
STOP2all/15	217	2018-11-28	kah106/kah93
STOP2all/15	221	2018-11-28	kah106/kah93
STOP2all/15	238	2018-11-28	kah106/kah93
STOP2all/15	267	2018-11-28	kah106/kah93
STOP2all/15	253	2018-11-28	kah106/kah93
STOP2all/15	291	2018-11-28	kah106/kah93
STOP2all/15	268	2018-11-28	kah106/kah93
STOP2all/15	241	2018-11-28	kah106/kah93
STOP2all/15	277	2018-11-28	kah106/kah93
STOP2all/15	227	2018-11-28	kah106/kah93
N2	350	2018-10-01	+
N2	310	2018-10-01	+
N2	314	2018-10-01	+
N2	329	2018-10-01	+
N2	332	2018-10-01	+
N2	338	2018-10-01	+
N2	317	2018-10-01	+
N2	309	2018-10-01	+
N2	266	2018-10-01	+
N2	353	2018-10-01	+
N2	333	2018-10-01	+
N2	349	2018-10-01	+
N2	308	2018-10-01	+
N2	343	2018-10-01	+
N2	280	2018-10-01	+
N2	347	2018-10-01	+
STOP2all/18	264	2018-10-01	kah106/kah96
STOP2all/18	343	2018-10-01	kah106/kah96
STOP2all/18	306	2018-10-01	kah106/kah96
STOP2all/18	337	2018-10-01	kah106/kah96
STOP2all/18	291	2018-10-01	kah106/kah96
STOP2all/18	322	2018-10-01	kah106/kah96
STOP2all/18	279	2018-10-01	kah106/kah96
STOP2all/18	326	2018-10-01	kah106/kah96
STOP2all/18	303	2018-10-01	kah106/kah96
STOP2all/18	293	2018-10-01	kah106/kah96
STOP2all/18	262	2018-10-01	kah106/kah96
STOP15/18	10	2017-03-02	kah93/kah96
STOP15/18	56	2017-03-02	kah93/kah96
STOP15/18	9	2017-03-02	kah93/kah96
STOP15/18	5	2017-03-02	kah93/kah96
STOP15/18	1	2017-03-02	kah93/kah96
STOP15/18	21	2017-03-02	kah93/kah96
STOP15/18	0	2017-03-02	kah93/kah96
STOP15/18	9	2017-03-02	kah93/kah96
STOP15/18	5	2017-03-02	kah93/kah96
STOP15/18	0	2017-03-02	kah93/kah96
STOP15/18	0	2017-03-02	kah93/kah96
STOP15/18	5	2017-03-02	kah93/kah96
N2	376	2017-03-02	+
N2	301	2017-03-02	+
N2	354	2017-03-02	+
N2	350	2017-03-02	+
N2	305	2017-03-02	+
N2	382	2017-03-02	+
N2	337	2017-03-02	+
N2	305	2017-03-02	+
N2	357	2017-03-02	+
N2	319	2017-03-02	+
N2	300	2017-03-02	+
N2	332	2017-03-02	+
N2	354	2017-03-02	+
N2	322	2017-03-02	+
N2	299	2017-03-02	+
N2	355	2017-03-02	+

## Sheet: Figure4c
strain	fecundity	date	genotype	nurf-1.d rescue	genetic background
N2	325	2018-12-02	+	-	N2
N2	325	2018-12-02	+	-	N2
N2	355	2018-12-02	+	-	N2
N2	308	2018-12-02	+	-	N2
N2	304	2018-12-02	+	-	N2
N2	331	2018-12-02	+	-	N2
N2	352	2018-12-02	+	-	N2
N2	306	2018-12-02	+	-	N2
N2	304	2018-12-02	+	-	N2
N2	358	2018-12-02	+	-	N2
N2	366	2018-12-02	+	-	N2
N2	319	2018-12-02	+	-	N2
STOP18	0	2018-12-02	kah96	-	N2
STOP18	8	2018-12-02	kah96	-	N2
STOP18	0	2018-12-02	kah96	-	N2
STOP18	0	2018-12-02	kah96	-	N2
STOP18	23	2018-12-02	kah96	-	N2
STOP18	12	2018-12-02	kah96	-	N2
STOP18	7	2018-12-02	kah96	-	N2
STOP18	0	2018-12-02	kah96	-	N2
STOP18	8	2018-12-02	kah96	-	N2
STOP18	0	2018-12-02	kah96	-	N2
STOP18	14	2018-12-02	kah96	-	N2
STOP18	0	2018-12-02	kah96	-	N2
STOP18dMos	326	2018-12-02	kah96	+	N2
STOP18dMos	407	2018-12-02	kah96	+	N2
STOP18dMos	442	2018-12-02	kah96	+	N2
STOP18dMos	324	2018-12-02	kah96	+	N2
STOP18dMos	387	2018-12-02	kah96	+	N2
STOP18dMos	341	2018-12-02	kah96	+	N2
STOP18dMos	330	2018-12-02	kah96	+	N2
STOP18dMos	288	2018-12-02	kah96	+	N2
STOP18dMos	307	2018-12-02	kah96	+	N2
STOP18dMos	405	2018-12-02	kah96	+	N2
STOP18dMos	347	2018-12-02	kah96	+	N2
N2	301.833	2018-12-01	+	-	N2
N2	335.333	2018-12-01	+	-	N2
N2	302.333	2018-12-01	+	-	N2
N2	300.333	2018-12-01	+	-	N2
N2	321.167	2018-12-01	+	-	N2
n4295	241.667	2018-12-01	n4295	-	N2
n4295	290.167	2018-12-01	n4295	-	N2
n4295	260.667	2018-12-01	n4295	-	N2
n4295	254.667	2018-12-01	n4295	-	N2
n4295	275.667	2018-12-01	n4295	-	N2
n4295dMos	336.833	2018-12-01	n4295	+	N2
n4295dMos	316	2018-12-01	n4295	+	N2
n4295dMos	340	2018-12-01	n4295	+	N2
n4295dMos	322	2018-12-01	n4295	+	N2
n4295dMos	307	2018-12-01	n4295	+	N2
N2	288	2018-11-28	+	-	N2
N2	325	2018-11-28	+	-	N2
N2	327	2018-11-28	+	-	N2
N2	306	2018-11-28	+	-	N2
N2	219	2018-11-28	+	-	N2
N2	324	2018-11-28	+	-	N2
N2	298	2018-11-28	+	-	N2
N2	288	2018-11-28	+	-	N2
N2	276	2018-11-28	+	-	N2
N2	339	2018-11-28	+	-	N2
N2	300	2018-11-28	+	-	N2
N2	262	2018-11-28	+	-	N2
STOP15	164	2018-11-28	kah93	-	N2
STOP15	94	2018-11-28	kah93	-	N2
STOP15	105	2018-11-28	kah93	-	N2
STOP15	25	2018-11-28	kah93	-	N2
STOP15	31	2018-11-28	kah93	-	N2
STOP15	148	2018-11-28	kah93	-	N2
STOP15	96	2018-11-28	kah93	-	N2
STOP15	82	2018-11-28	kah93	-	N2
STOP15	12	2018-11-28	kah93	-	N2
STOP15	173	2018-11-28	kah93	-	N2
STOP15	205	2018-11-28	kah93	-	N2
STOP15	47	2018-11-28	kah93	-	N2
STOP15dMos	271	2018-11-28	kah93	+	N2
STOP15dMos	297	2018-11-28	kah93	+	N2
STOP15dMos	294	2018-11-28	kah93	+	N2
STOP15dMos	277	2018-11-28	kah93	+	N2
STOP15dMos	270	2018-11-28	kah93	+	N2
STOP15dMos	323	2018-11-28	kah93	+	N2
STOP15dMos	215	2018-11-28	kah93	+	N2
STOP15dMos	235	2018-11-28	kah93	+	N2
STOP15dMos	249	2018-11-28	kah93	+	N2
STOP15dMos	229	2018-11-28	kah93	+	N2
STOP15dMos	206	2018-11-28	kah93	+	N2
STOP15dMos	268	2018-11-28	kah93	+	N2
STOP2all	0	2018-11-28	kah106	-	N2
STOP2all	0	2018-11-28	kah106	-	N2
STOP2all	0	2018-11-28	kah106	-	N2
STOP2all	0	2018-11-28	kah106	-	N2
STOP2all	0	2018-11-28	kah106	-	N2
STOP2all	0	2018-11-28	kah106	-	N2
STOP2all	0	2018-11-28	kah106	-	N2
STOP2all	0	2018-11-28	kah106	-	N2
STOP2all	0	2018-11-28	kah106	-	N2
STOP2all	0	2018-11-28	kah106	-	N2
STOP2all	0	2018-11-28	kah106	-	N2
STOP2all	0	2018-11-28	kah106	-	N2
STOP2alldMos	0	2018-11-28	kah106	+	N2
STOP2alldMos	0	2018-11-28	kah106	+	N2
STOP2alldMos	0	2018-11-28	kah106	+	N2
STOP2alldMos	0	2018-11-28	kah106	+	N2
STOP2alldMos	0	2018-11-28	kah106	+	N2
STOP2alldMos	0	2018-11-28	kah106	+	N2
STOP2alldMos	0	2018-11-28	kah106	+	N2
STOP2alldMos	0	2018-11-28	kah106	+	N2
STOP2alldMos	0	2018-11-28	kah106	+	N2
STOP2alldMos	0	2018-11-28	kah106	+	N2
STOP2alldMos	0	2018-11-28	kah106	+	N2
STOP2alldMos	0	2018-11-28	kah106	+	N2
CX12311	241.5	2018-12-01	+	-	N2*(CX12311)
CX12311	260	2018-12-01	+	-	N2*(CX12311)
CX12311	288.833	2018-12-01	+	-	N2*(CX12311)
CX12311	260.667	2018-12-01	+	-	N2*(CX12311)
CX12311	257.5	2018-12-01	+	-	N2*(CX12311)
PTM88	223.1	2018-12-01	kah3	-	N2*(CX12311)
PTM88	214.167	2018-12-01	kah3	-	N2*(CX12311)
PTM88	271.833	2018-12-01	kah3	-	N2*(CX12311)
PTM88	234.767	2018-12-01	kah3	-	N2*(CX12311)
PTM88	252	2018-12-01	kah3	-	N2*(CX12311)
ARLd_dMos	277.633	2018-12-01	kah3	+	N2*(CX12311)
ARLd_dMos	244.2	2018-12-01	kah3	+	N2*(CX12311)
ARLd_dMos	271.917	2018-12-01	kah3	+	N2*(CX12311)
ARLd_dMos	268.1	2018-12-01	kah3	+	N2*(CX12311)
ARLd_dMos	278.1	2018-12-01	kah3	+	N2*(CX12311)
