# Supplementary material for: Evolution of Yin and Yang isoforms of a chromatin remodeling subunit precedes the creation of two genes
Source: eLife. 2019 Sep 9;8:e48119. doi: 10.7554/eLife.48119 (PMC6752949; doi:10.7554/eLife.48119)
Supplement: Figure 5—source data 1. [file elife-48119-fig5-data1.xlsx]

## Sheet: Figure5c
strain	size	date	genotype
N2	0.960951	2016-09-16	+
N2	1.09188	2016-09-16	+
N2	0.886362	2016-09-16	+
N2	1.0608	2016-09-16	+
PHD1	1.12944	2016-09-16	kah16
PHD1	1.21334	2016-09-16	kah16
PHD1	1.0166	2016-09-16	kah16
PHD1	1.16338	2016-09-16	kah16
PHD2	0.869964	2016-09-16	kah19
PHD2	0.91794	2016-09-16	kah19
PHD2	0.773371	2016-09-16	kah19
PHD2	0.905828	2016-09-16	kah20
PHD2	0.900532	2016-09-16	kah20
PHD2	0.90557	2016-09-16	kah20
PHD2	1.0259	2016-09-16	kah20
N2	0.991745	2016-10-21	+
N2	0.98296	2016-10-21	+
N2	1.0253	2016-10-21	+
MT13649	0.596214	2016-10-21	n4295
MT13649	0.664404	2016-10-21	n4295
MT13649	0.62168	2016-10-21	n4295
PHD1	1.00736	2016-10-21	kah16
PHD1	1.04383	2016-10-21	kah16
PHD1	0.985874	2016-10-21	kah16
PHD2	0.890468	2016-10-21	kah19
PHD2	0.932668	2016-10-21	kah19
PHD2	0.934521	2016-10-21	kah19
PHD2	0.923143	2016-10-21	kah20
PHD2	0.912422	2016-10-21	kah20
PHD2	0.945295	2016-10-21	kah20
Bromo	0.903174	2016-10-21	kah21
Bromo	0.970822	2016-10-21	kah21
Bromo	0.986497	2016-10-21	kah21
Bromo	0.98679	2016-10-21	kah32
Bromo	0.952884	2016-10-21	kah32
Bromo	0.987267	2016-10-21	kah32
2PHDs	0.982267	2016-10-21	kah20,kah35
2PHDs	0.912488	2016-10-21	kah20,kah35
2PHDs	0.952049	2016-10-21	kah20,kah35
3domains	0.901433	2016-10-21	kah1,kah36,kah54
3domains	0.865575	2016-10-21	kah1,kah36,kah54
3domains	0.903174	2016-10-21	kah1,kah36,kah54
2PHDs	0.983124	2016-10-21	kah19,kah36
2PHDs	1.00151	2016-10-21	kah19,kah36
2PHDs	0.972175	2016-10-21	kah19,kah36

## Sheet: Figure5d
strain	group	36-42hr	60-66hr	date	genotype
N2	1	8.38889	0.416667	2016-08-18	+
N2	2	8.05556	1.02778	2016-08-18	+
N2	3	7.63889	1.86111	2016-08-18	+
N2	4	8.13889	0.444444	2016-08-18	+
N2	5	8.08333	1.08333	2016-08-18	+
MT13649	1	4.41667	5.97222	2016-08-18	n4295
MT13649	2	4.33333	6.05556	2016-08-18	n4295
MT13649	3	3.88889	5.41667	2016-08-18	n4295
MT13649	4	4.52778	5.30556	2016-08-18	n4295
MT13649	5	4.69444	5.47222	2016-08-18	n4295
3d	1	7.47222	4.91667	2016-08-18	kah1,kah36,kah54
3d	2	7.44444	3.97222	2016-08-18	kah1,kah36,kah54
3d	3	7.33333	4.36111	2016-08-18	kah1,kah36,kah54
3d	4	7.08333	3.05556	2016-08-18	kah1,kah36,kah54
3d	5	7.41667	4.97222	2016-08-18	kah1,kah36,kah54
3d	6	7.41667	2.72222	2016-08-18	kah1,kah36,kah54
3d	7	7.36111	3.55556	2016-08-18	kah1,kah36,kah54
3d	8	7.05556	3.66667	2016-08-18	kah1,kah36,kah54
3d	9	7.13889	2.41667	2016-08-18	kah1,kah36,kah54
3d	10	7.91667	2.47222	2016-08-18	kah1,kah36,kah54
N2	6	9.08333	1	2016-08-19	+
N2	7	9.36111	0.972222	2016-08-19	+
N2	8	8.25	0.583333	2016-08-19	+
N2	9	8.86111	0.333333	2016-08-19	+
N2	10	9.63889	0.555556	2016-08-19	+
MT13649	6	4.69444	5.27778	2016-08-19	n4295
MT13649	7	4.75	5.11111	2016-08-19	n4295
MT13649	8	4.83333	5.5	2016-08-19	n4295
MT13649	9	4.55556	5.88889	2016-08-19	n4295
MT13649	10	4.66667	5.66667	2016-08-19	n4295
3d	11	8.33333	4.22222	2016-08-19	kah1,kah36,kah54
3d	12	7.86111	4.55556	2016-08-19	kah1,kah36,kah54
3d	13	6.47222	4.08333	2016-08-19	kah1,kah36,kah54
3d	14	7.77778	5.36111	2016-08-19	kah1,kah36,kah54
3d	15	7.47222	4.5	2016-08-19	kah1,kah36,kah54
3d	16	7.44444	1.8	2016-08-19	kah1,kah36,kah54
3d	17	7.72222	2.80556	2016-08-19	kah1,kah36,kah54
3d	18	7.61111	4.30556	2016-08-19	kah1,kah36,kah54
3d	19	7.05556	5.08333	2016-08-19	kah1,kah36,kah54
3d	20	7.75	3.19444	2016-08-19	kah1,kah36,kah54
