# Supplementary material for: Evolution of Yin and Yang isoforms of a chromatin remodeling subunit precedes the creation of two genes
Source: eLife. 2019 Sep 9;8:e48119. doi: 10.7554/eLife.48119 (PMC6752949; doi:10.7554/eLife.48119)
Supplement: Figure 6—source data 1. [file elife-48119-fig6-data1.xlsx]

## Sheet: Figure6b
strain	sperm	genotype
N2	267	+
N2	222	+
N2	358	+
N2	307	+
N2	220	+
N2	264	+
N2	337	+
N2	301	+
STOP2all	29	kah106
STOP2all	92	kah106
STOP2all	43	kah106
STOP2all	13	kah106
STOP2all	69	kah106
STOP2all	158	kah106
STOP2all	138	kah106
STOP15	607	kah93
STOP15	310	kah93
STOP15	209	kah93
STOP15	283	kah93
STOP15	338	kah93
STOP15	370	kah93
STOP15	370	kah93
STOP18	344	kah96
STOP18	501	kah96
STOP18	531	kah96
STOP18	500	kah96
STOP18	499	kah96
STOP18	541	kah96
STOP18	538	kah96
STOP18	465	kah96
STOP18	362	kah96

## Sheet: Figure6c
strain	oocyte	genotype
N2	6	+
N2	2	+
N2	7	+
N2	6	+
N2	7	+
N2	5	+
N2	10	+
N2	7	+
STOP2all	7	kah106
STOP2all	4	kah106
STOP2all	4	kah106
STOP2all	0	kah106
STOP2all	7	kah106
STOP2all	6	kah106
STOP2all	4	kah106
STOP15	2	kah93
STOP15	0	kah93
STOP15	0	kah93
STOP15	3	kah93
STOP15	0	kah93
STOP15	4	kah93
STOP15	2	kah93
STOP18	0	kah96
STOP18	0	kah96
STOP18	0	kah96
STOP18	0	kah96
STOP18	0	kah96
STOP18	0	kah96
STOP18	0	kah96
STOP18	0	kah96
STOP18	0	kah96
