# Supplementary figures and images for: Evolution of Yin and Yang isoforms of a chromatin remodeling subunit precedes the creation of two genes
Source: eLife journal article supplement (doi:10.7554/elife.48119), 2019-09-07

Figure 4 - supplement 2

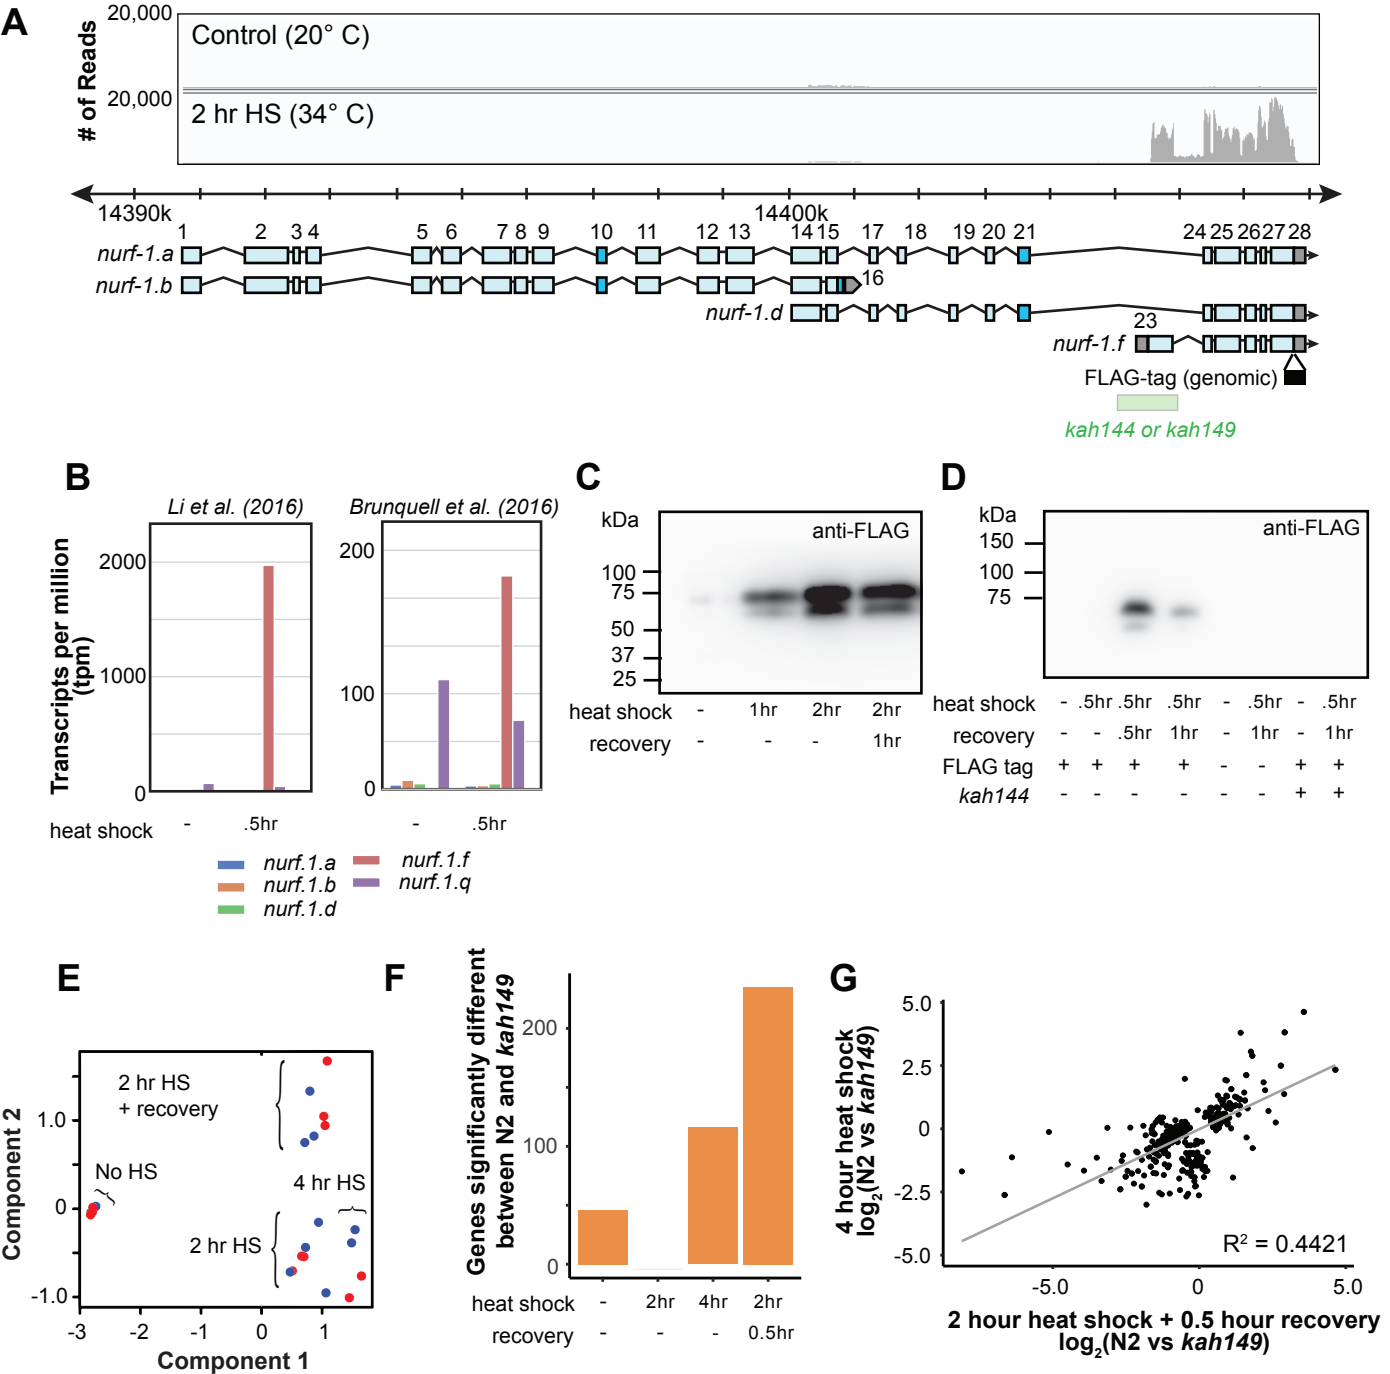

Supplement: supp [file elife-48119-supp-v1.zip]

Figure 4 - supplement 1

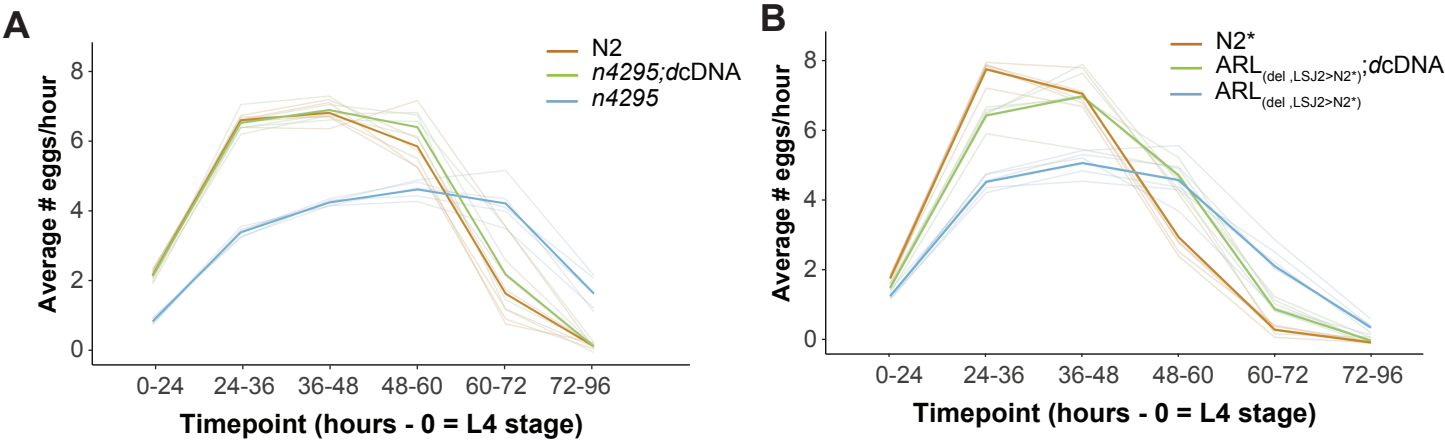

Supplement: supp [file elife-48119-supp-v1.zip]

Figure 6 - supplement 1

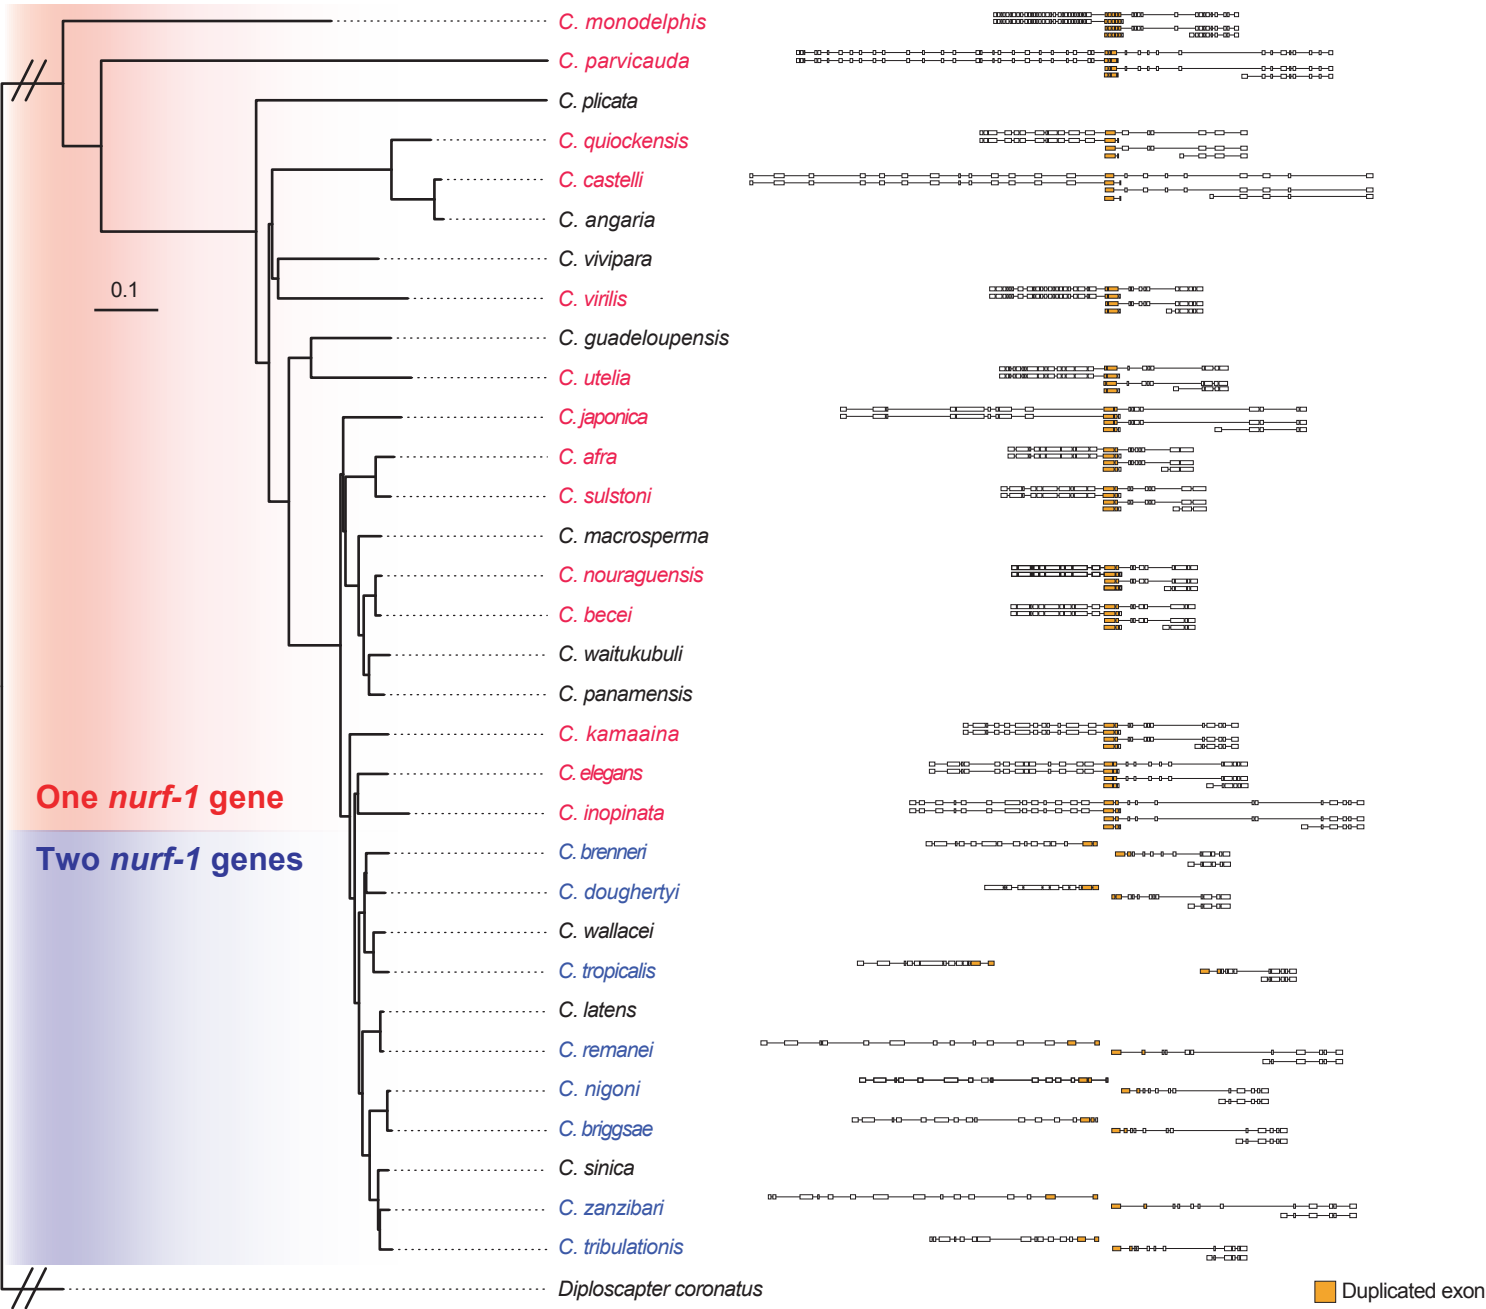

Supplement: supp [file elife-48119-supp-v1.zip]

Figure 6 - supplement 6

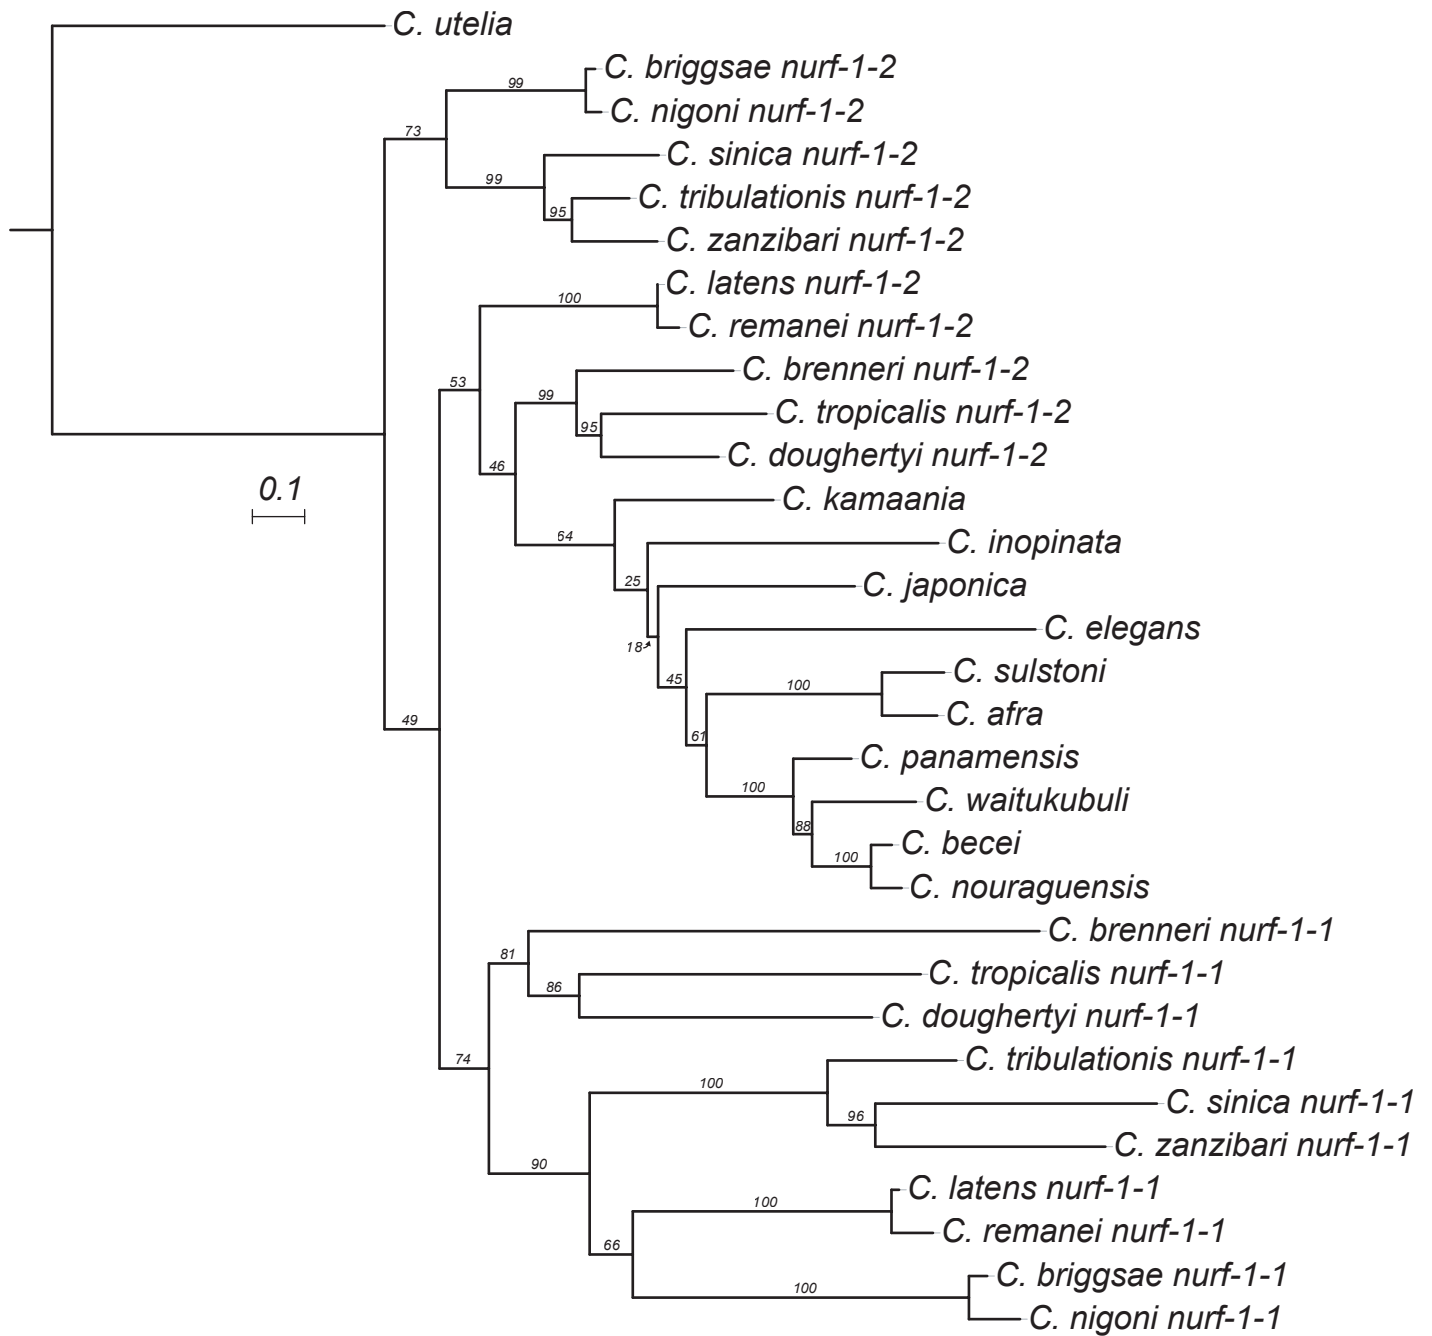

Supplement: supp [file elife-48119-supp-v1.zip]

Figure 6 - supplement 2

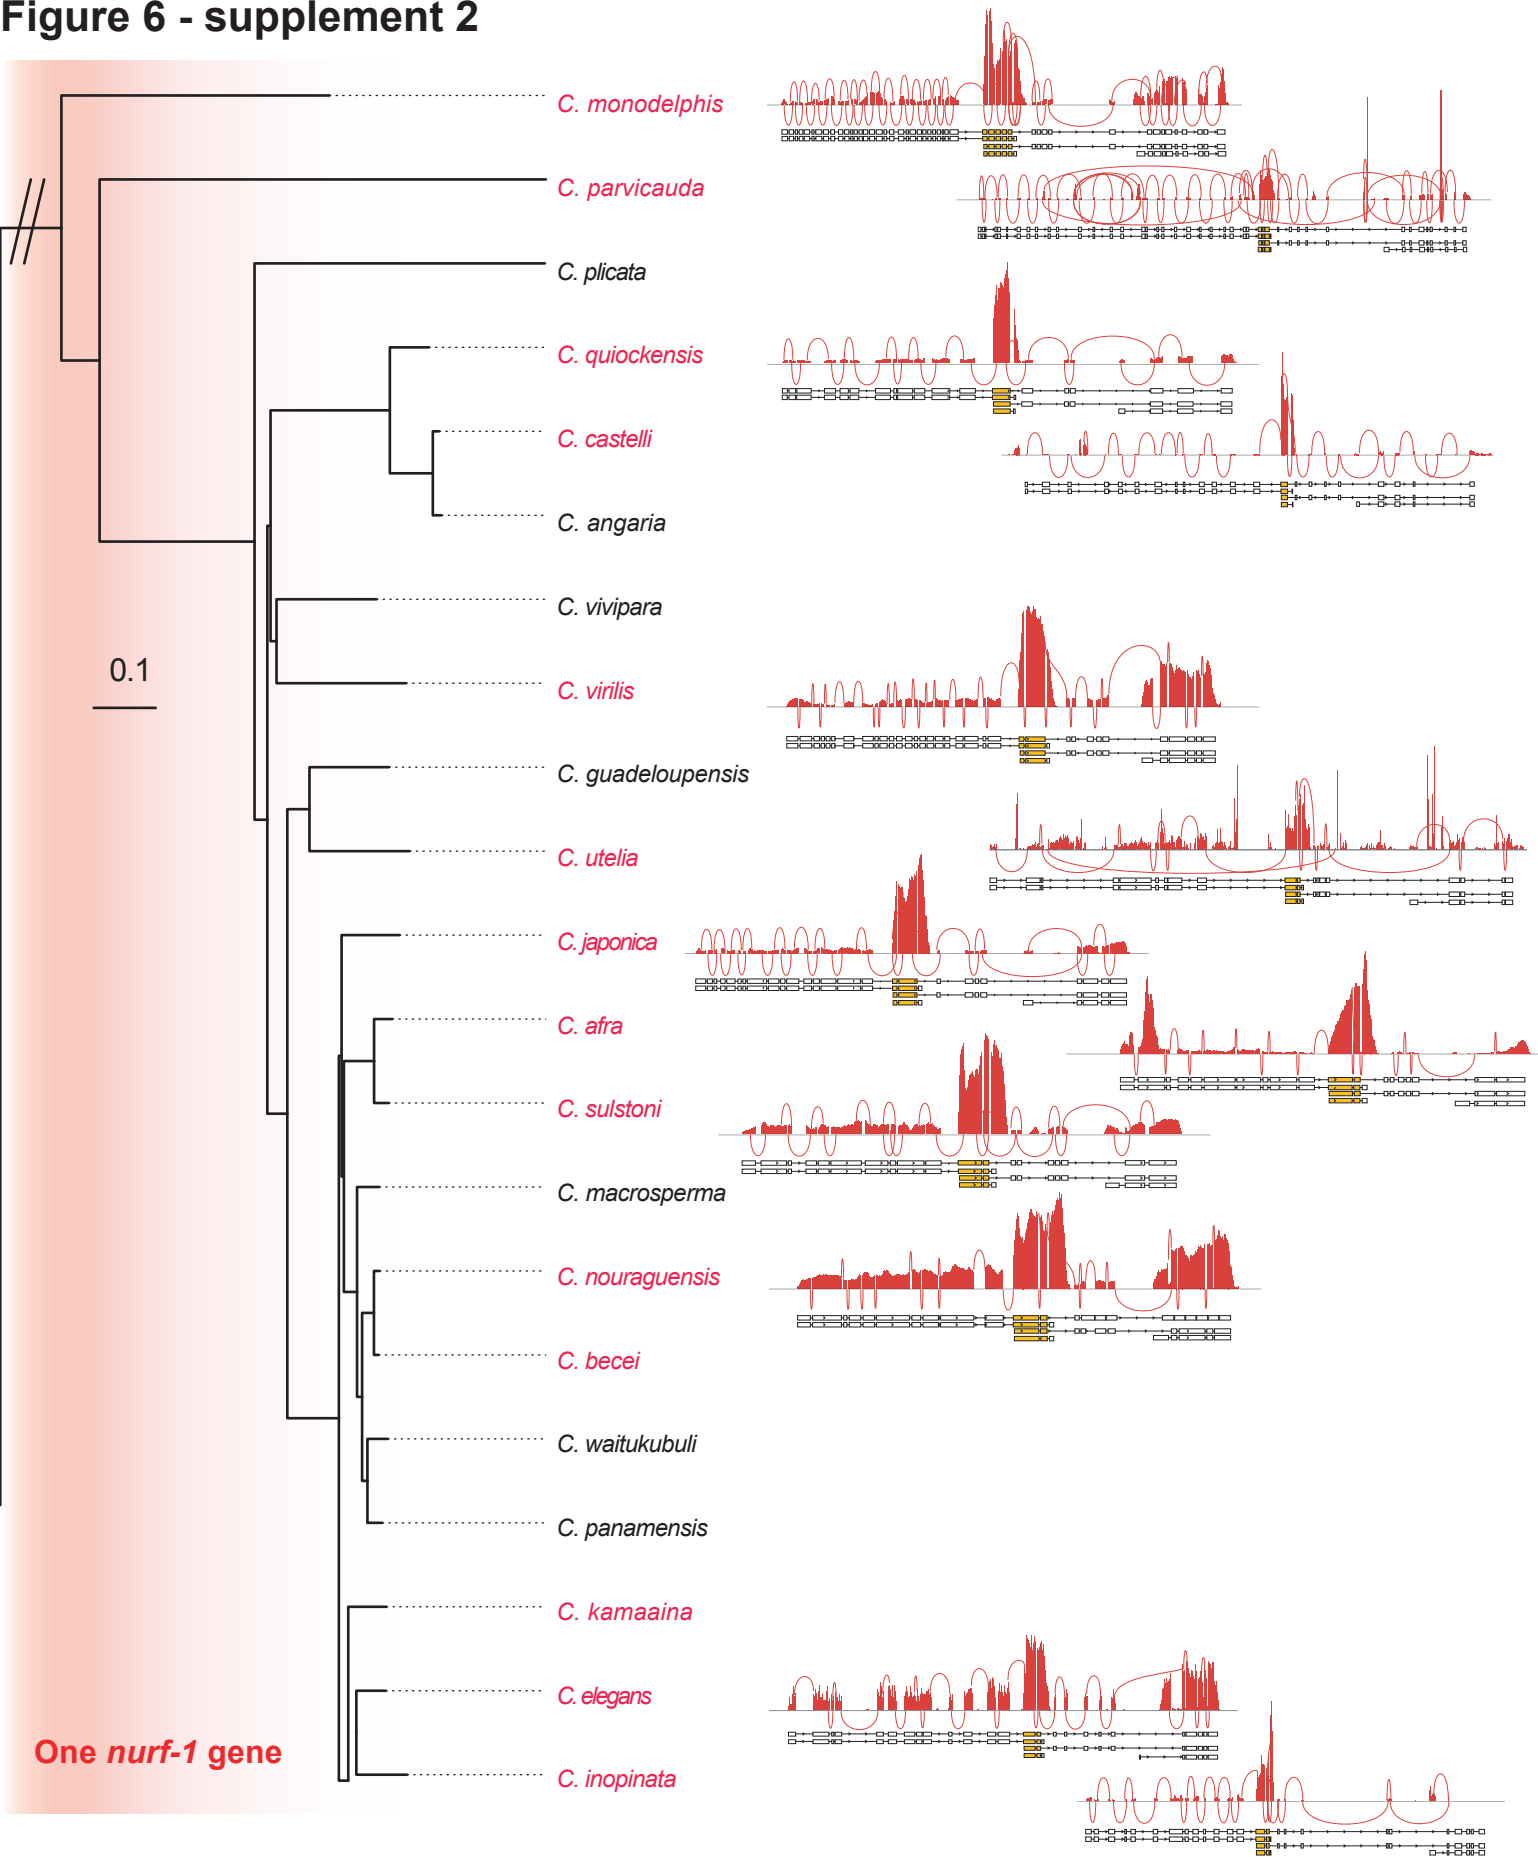

Supplement: supp [file elife-48119-supp-v1.zip]

Figure 1 - supplement 2

A

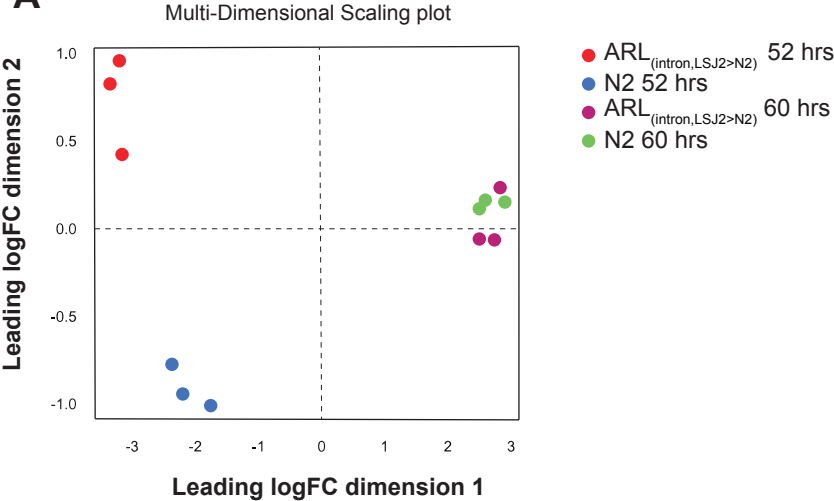

B

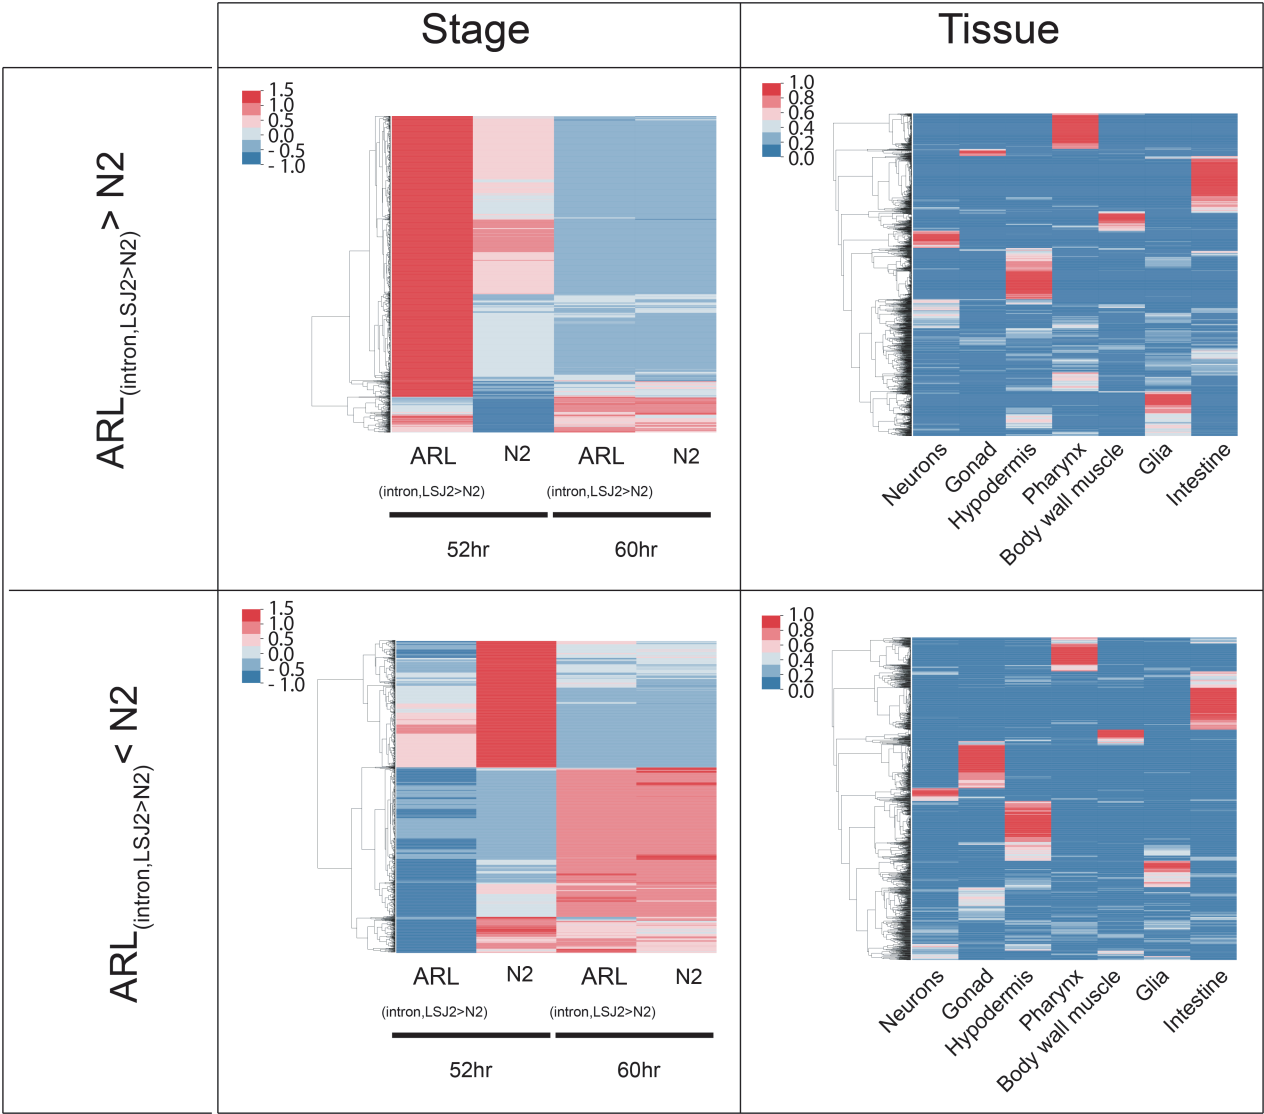

Supplement: supp [file elife-48119-supp-v1.zip]

Figure 3 - supplement 1

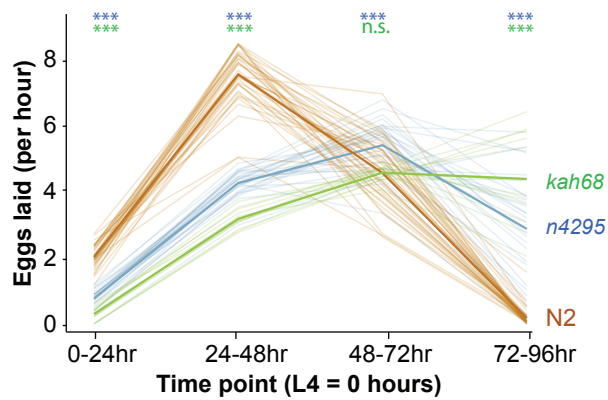

Supplement: supp [file elife-48119-supp-v1.zip]

Figure 6 - supplement 4

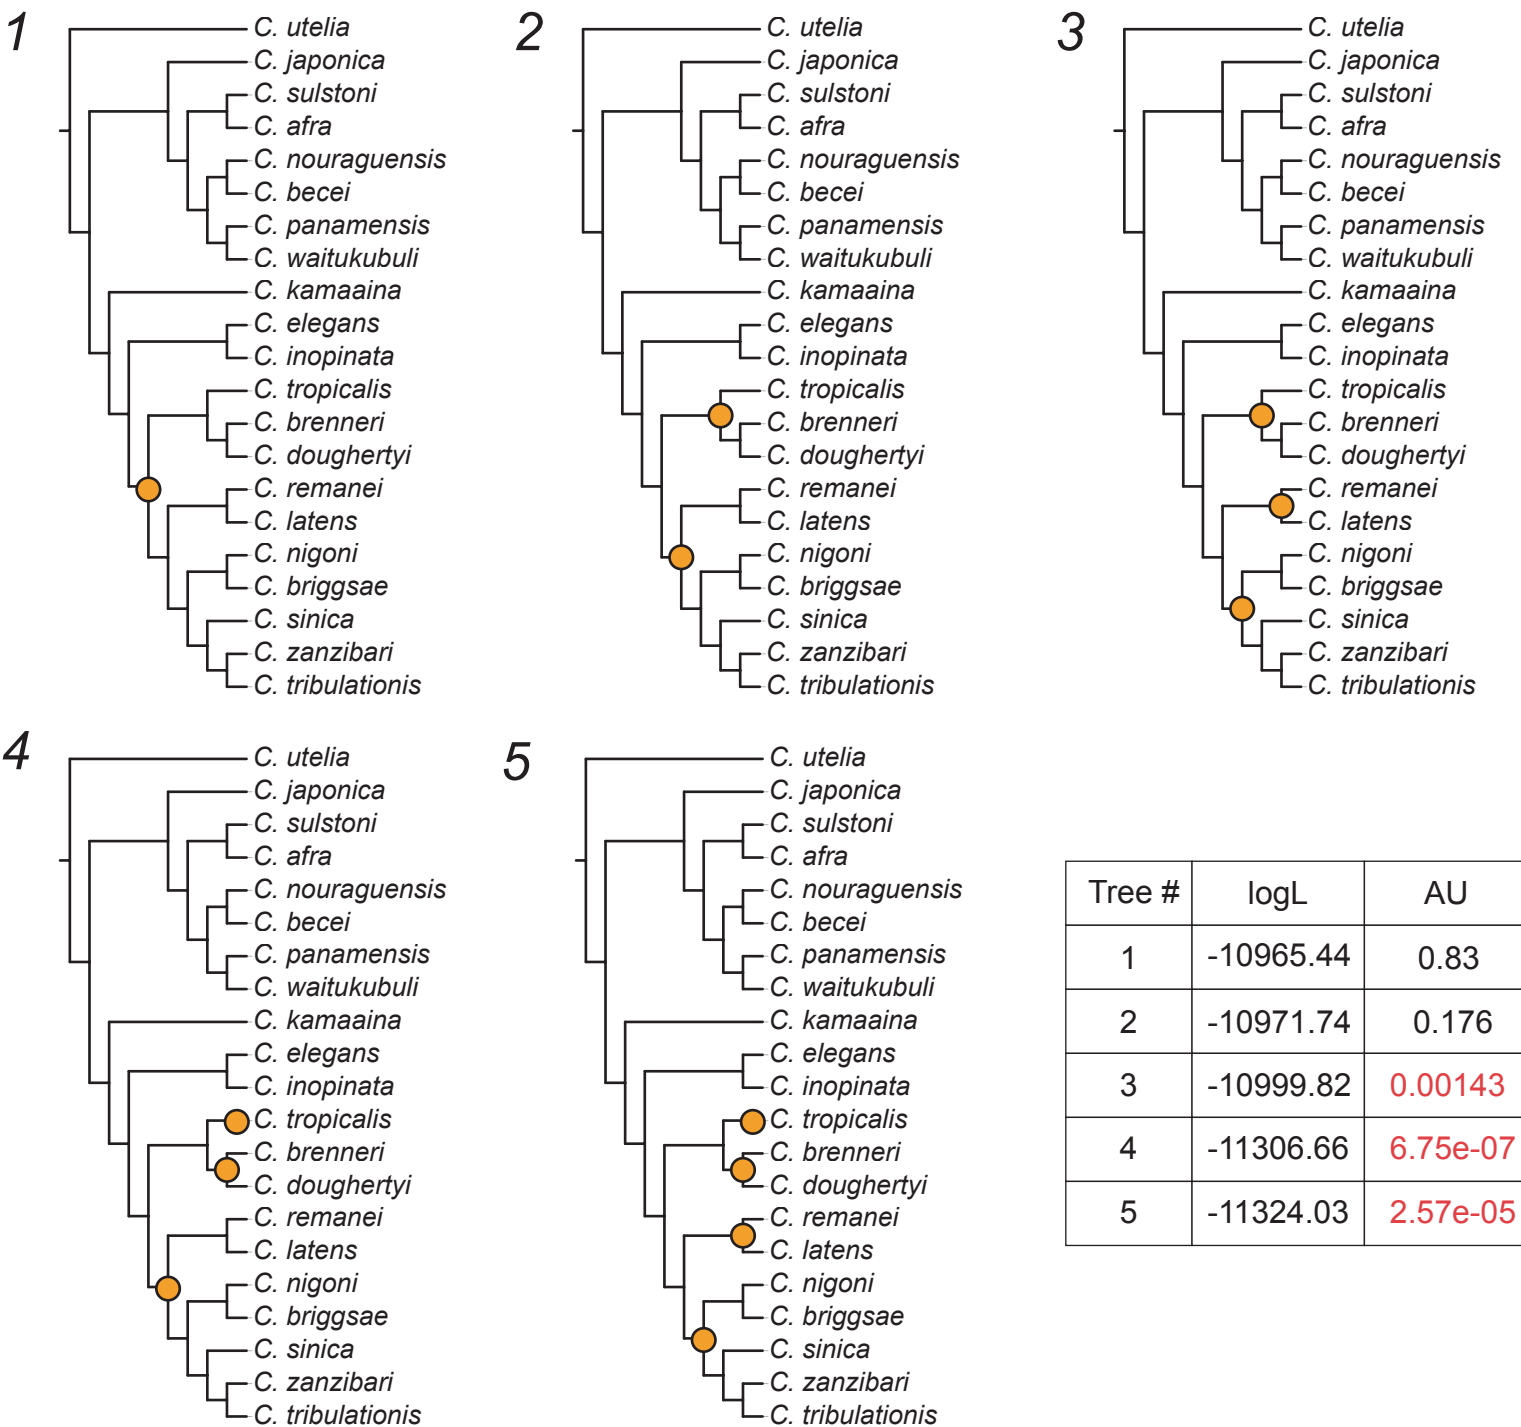

Supplement: supp [file elife-48119-supp-v1.zip]

Figure 3 - supplement 2

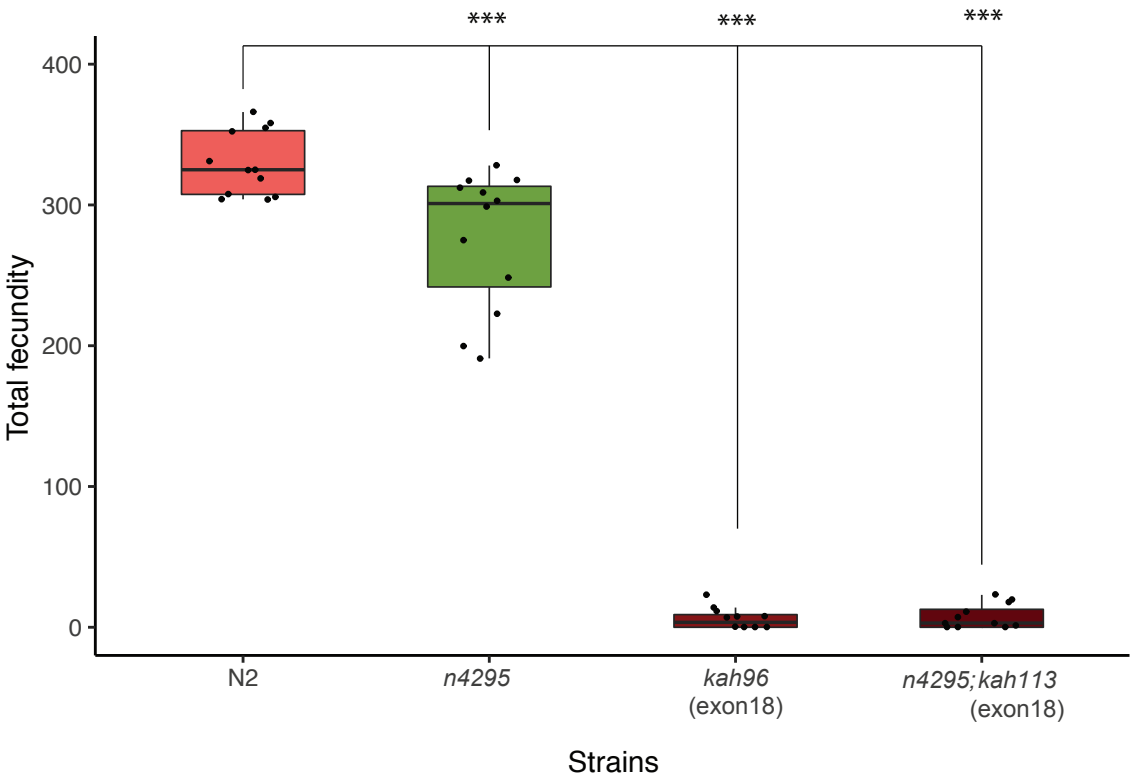

Supplement: supp [file elife-48119-supp-v1.zip]

Figure 3 - supplement 3

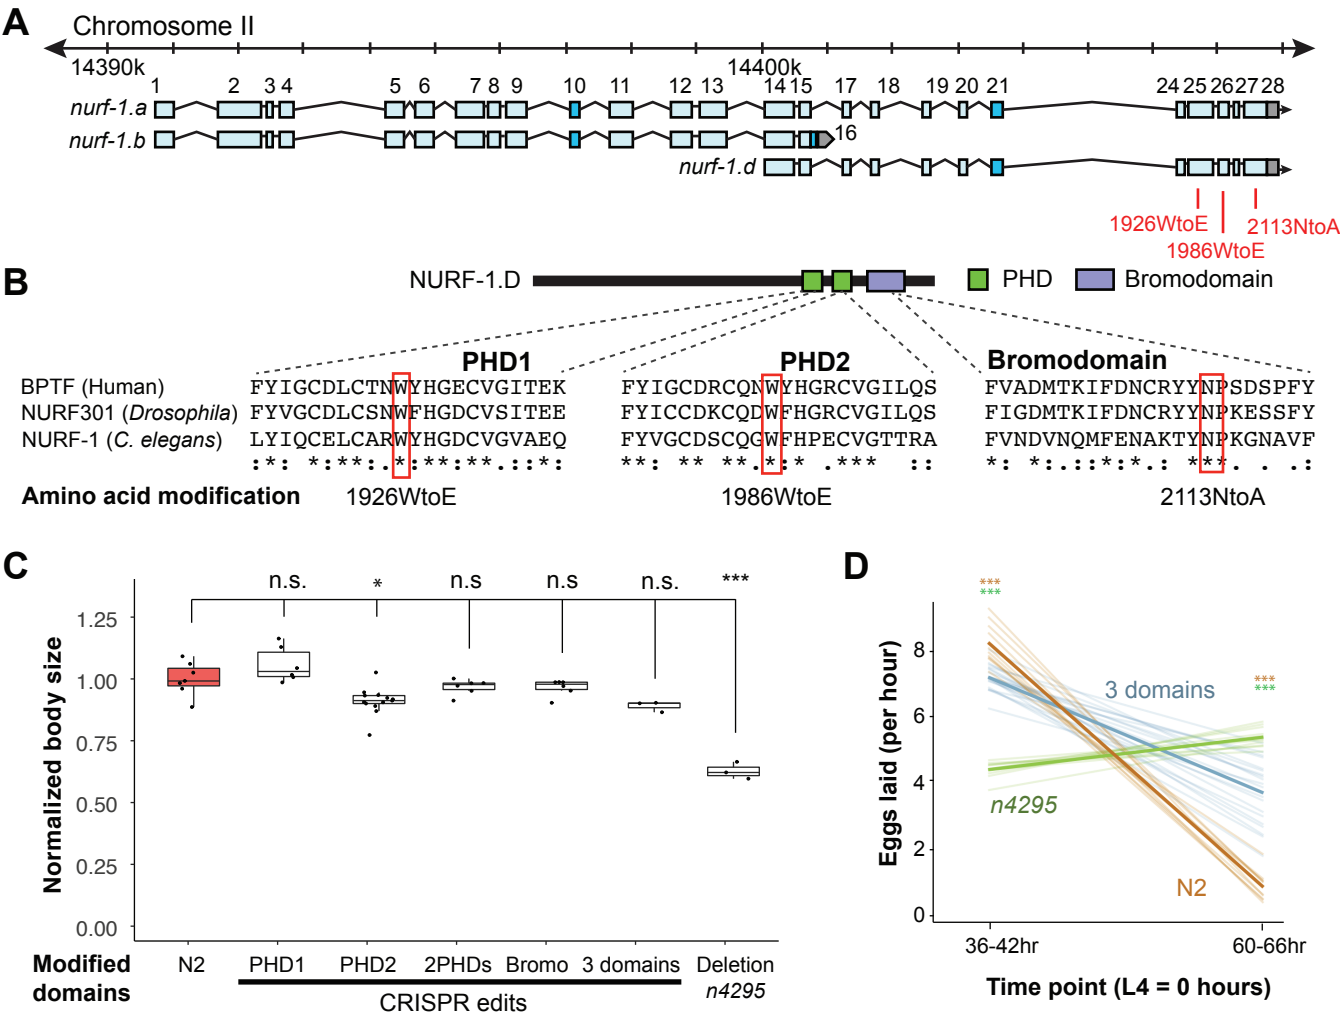

Supplement: supp [file elife-48119-supp-v1.zip]

Figure 1 - supplement 1

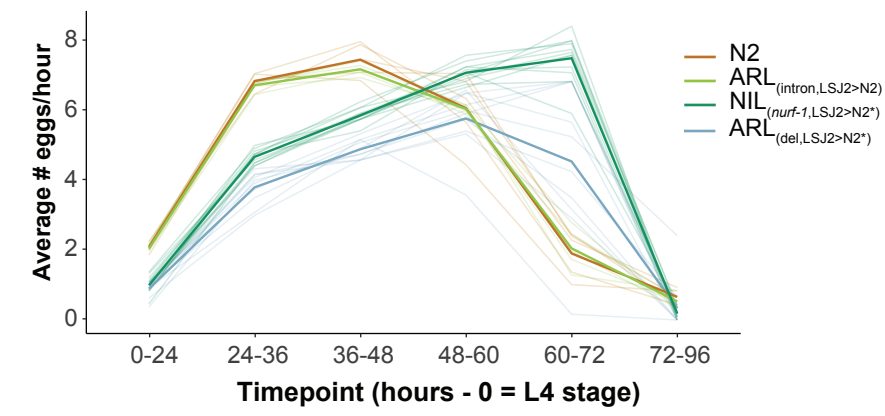

Supplement: supp [file elife-48119-supp-v1.zip]

Figure 2 - supplement 2

A

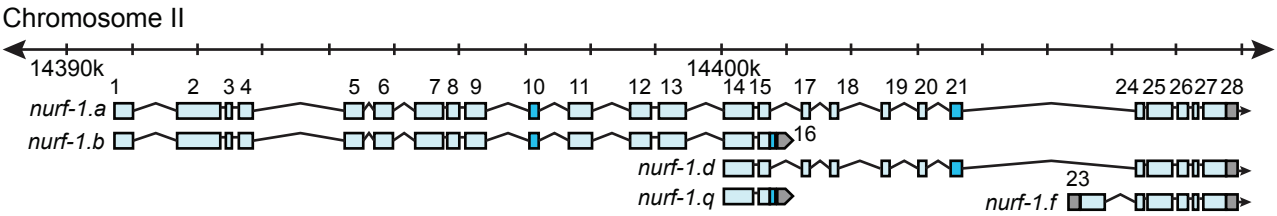

B

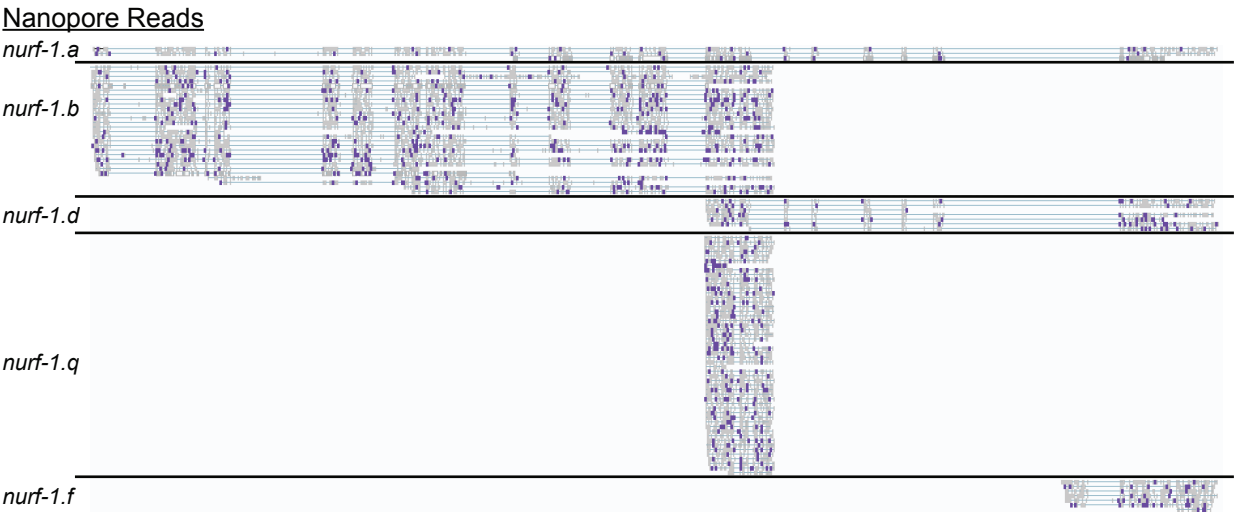

Supplement: supp [file elife-48119-supp-v1.zip]

Figure 2 - supplement 3

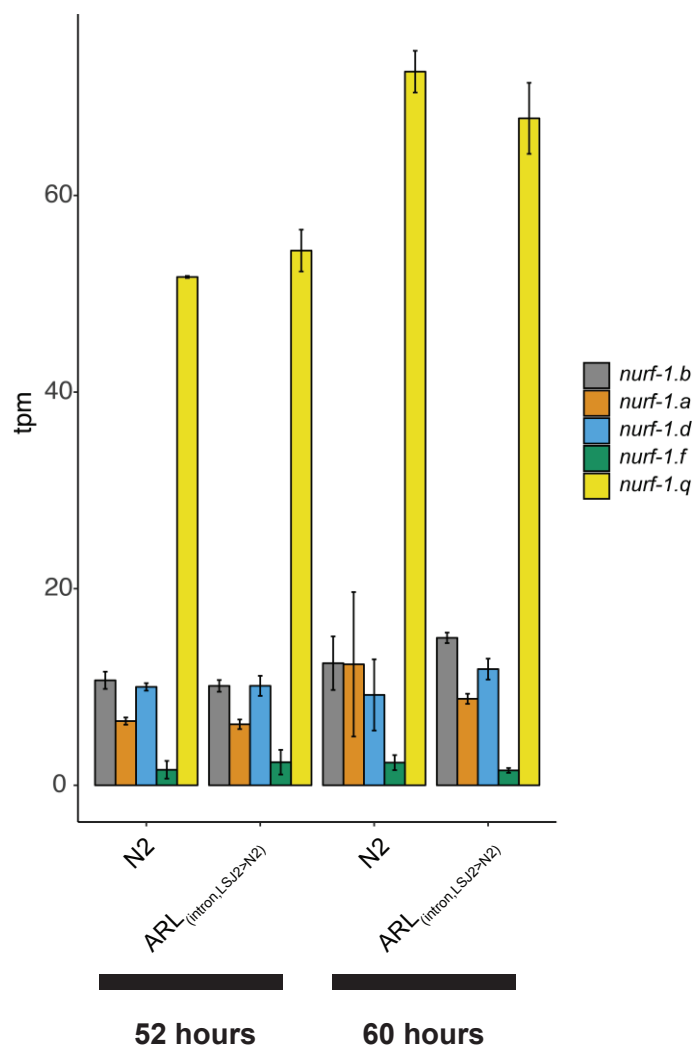

Supplement: supp [file elife-48119-supp-v1.zip]

**A**

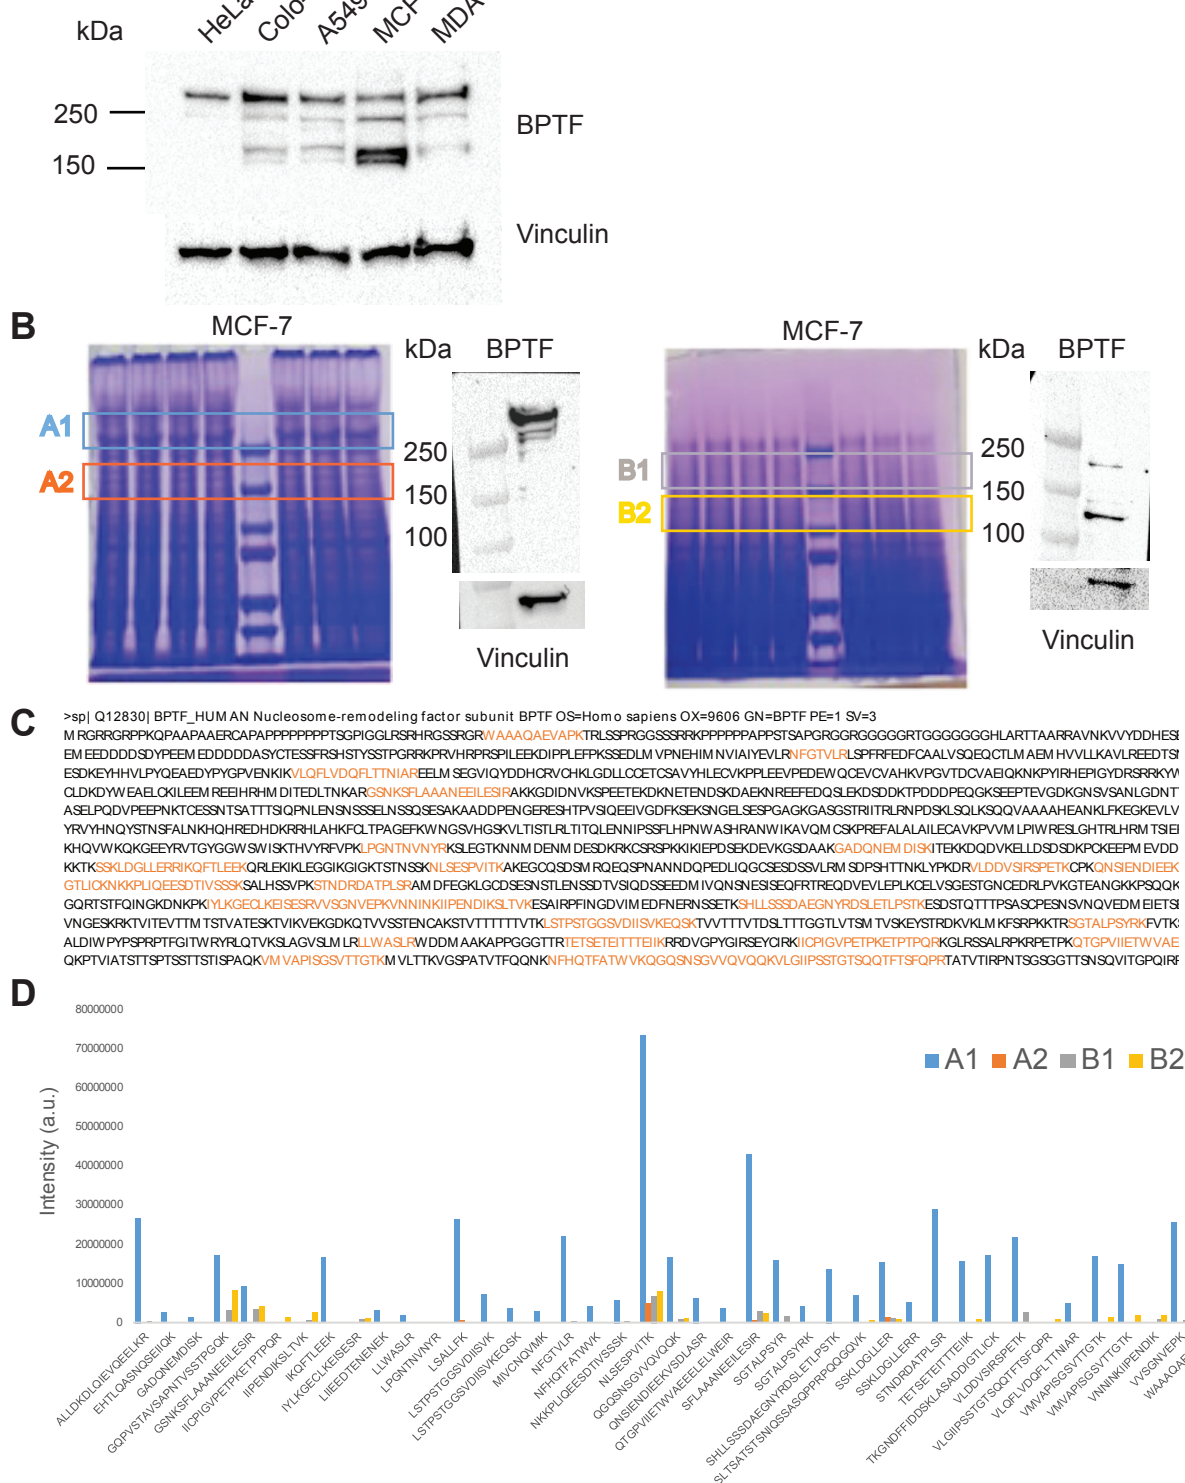

Supplement: supp [file elife-48119-supp-v1.zip]

Figure 5 - supplement 1

A

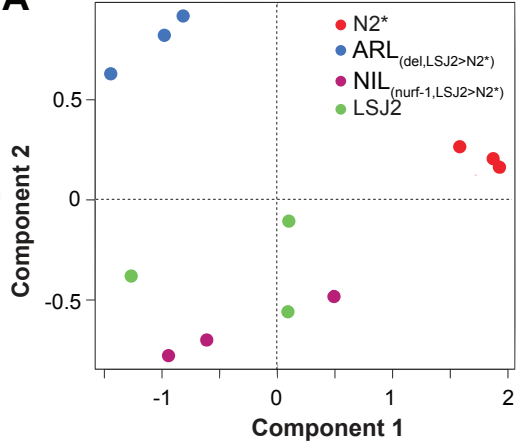

B

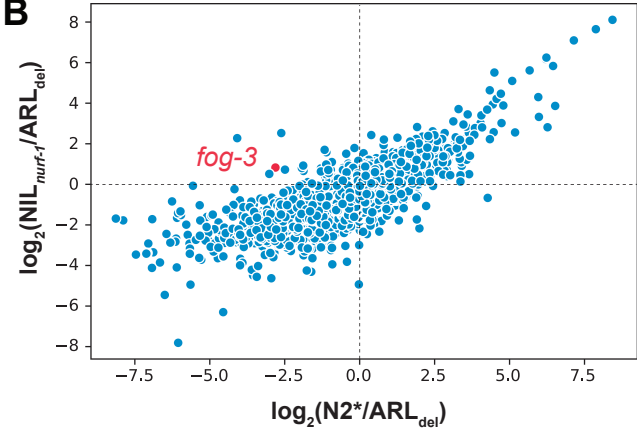

Supplement: supp [file elife-48119-supp-v1.zip]

**Figure 6 - supplement 5**

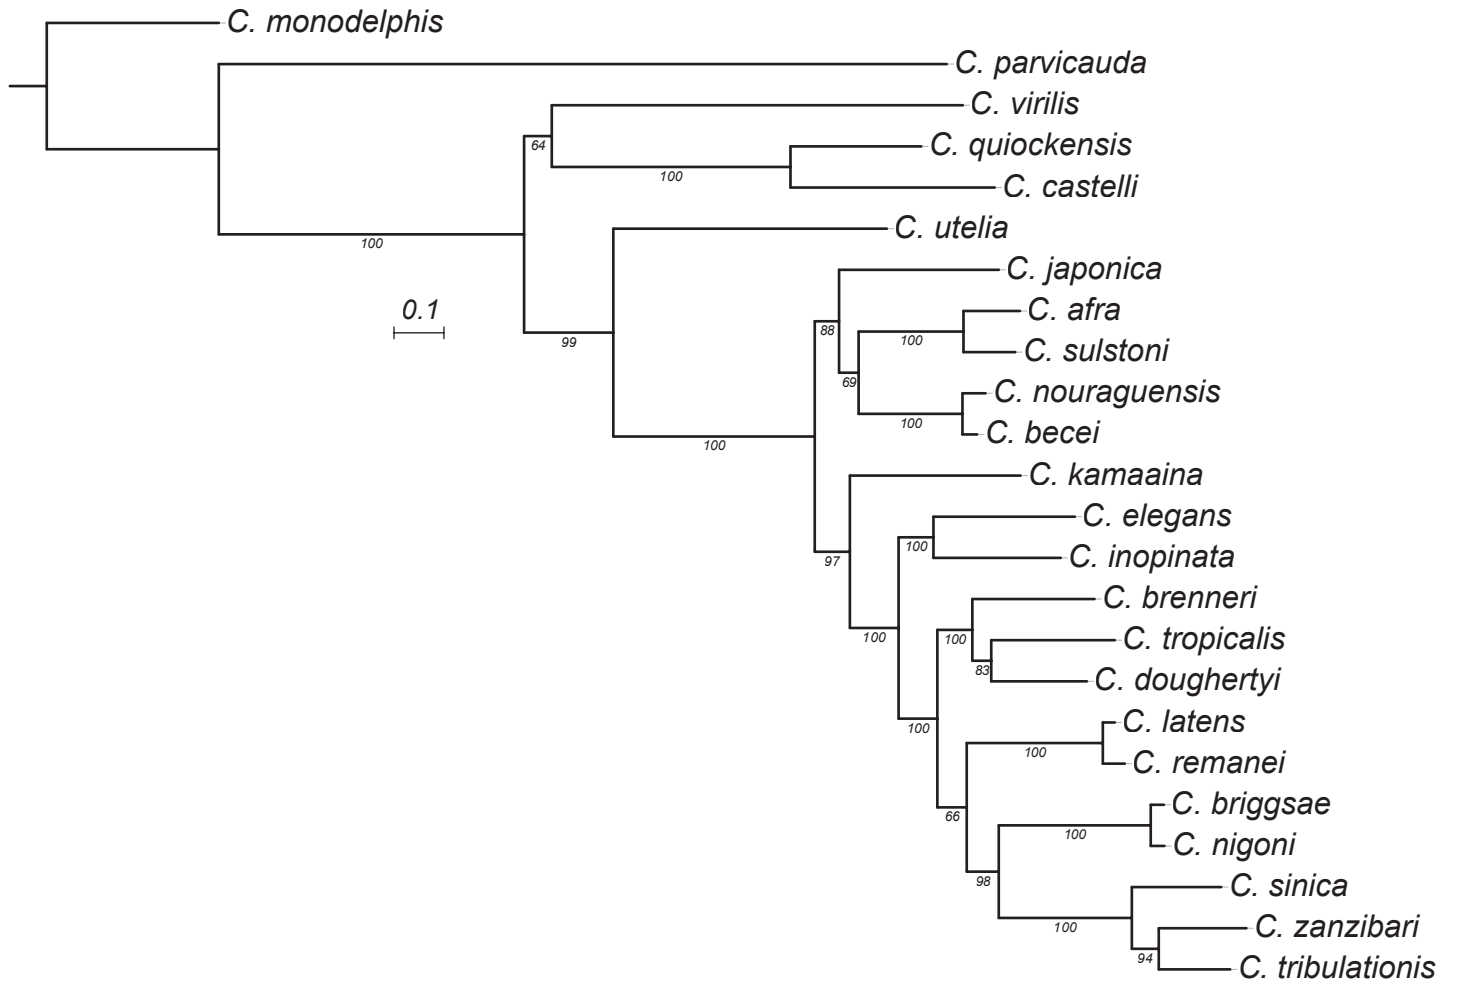

Supplement: supp [file elife-48119-supp-v1.zip]

Figure 2 - supplement 1

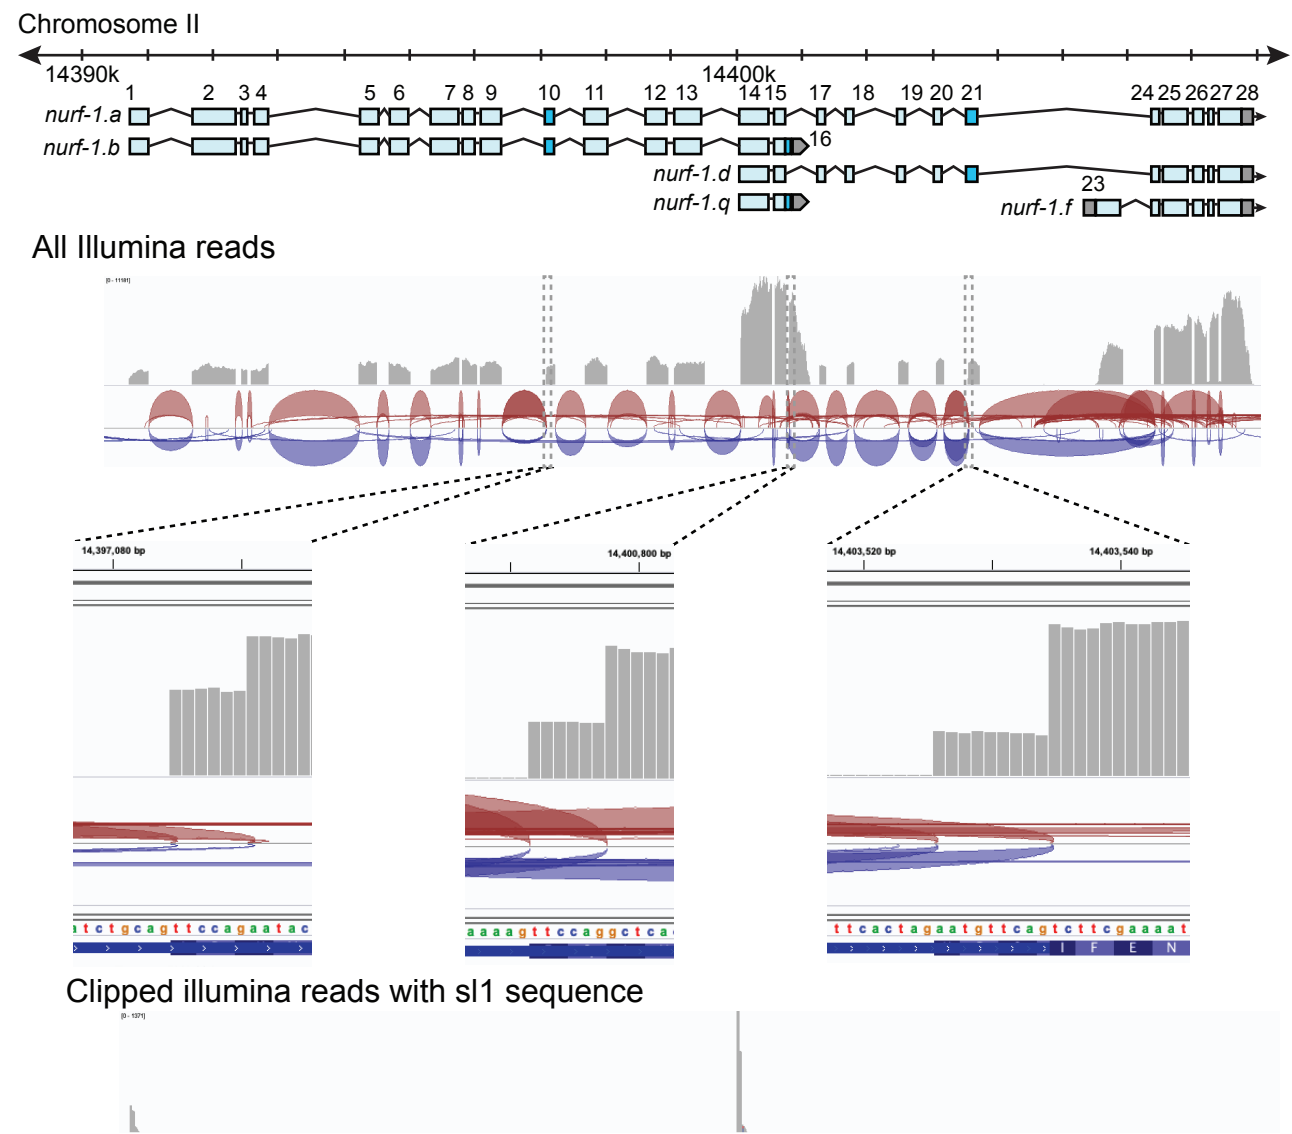

Supplement: supp [file elife-48119-supp-v1.zip]

Figure 6 - supplement 3

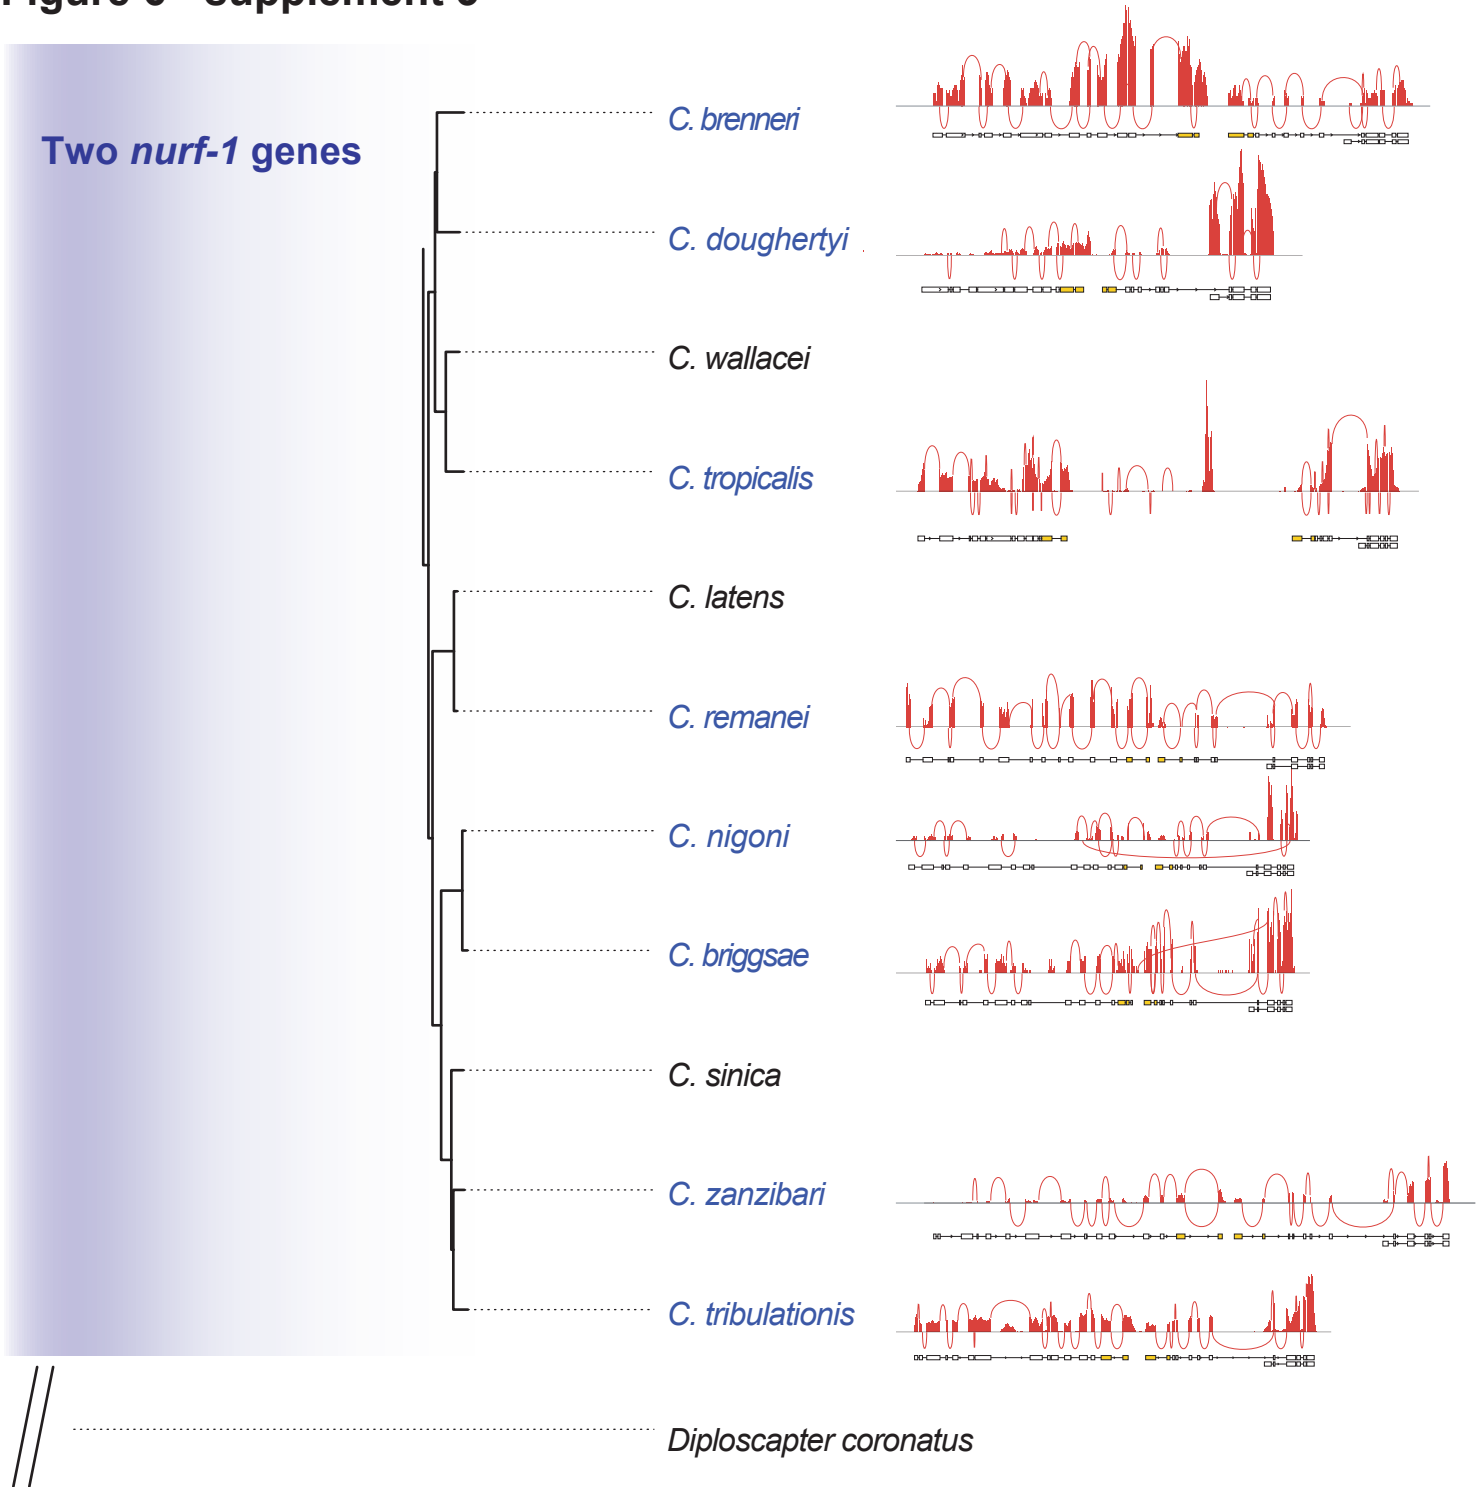

Supplement: supp [file elife-48119-supp-v1.zip]
